# Supplementary material for: Nickel-catalysed highly regioselective synthesis of β-acyl naphthalenes under reductive conditions
Source: Royal Society of Chemistry journal article supplement (doi:10.1039/d4cc01660b), 2024-01-01

## *Supporting Information*

### **Nickel-catalysed highly regioselective synthesis of $\beta$ -acyl naphthalenes under reductive conditions**

Yu-Juan Wu, Chen Ma\*, Jia-Fan Qiao, Xiao-Yu Cheng and Yu-Feng Liang\*

School of Chemistry and Chemical Engineering, Shandong University, Jinan 250100, China

Email: chenma@sdu.edu.cn, yfliang@sdu.edu.cn

#### **Table of Contents**

|                                                        |            |
|--------------------------------------------------------|------------|
| <b>1. General remarks .....</b>                        | <b>S2</b>  |
| <b>2. General procedure .....</b>                      | <b>S2</b>  |
| <b>3. Optimization of the reaction conditions.....</b> | <b>S4</b>  |
| <b>4. Characterization data for products.....</b>      | <b>S6</b>  |
| <b>5. References.....</b>                              | <b>S17</b> |
| <b>6. NMR spectra for products .....</b>               | <b>S19</b> |

## 1. General remarks

Substituted substrates **1** were obtained according to the literature reports.<sup>1</sup> Other reagents and solvents were obtained from commercially available and used directly without further purification. All the reactions were monitored by thin-layer chromatography. <sup>1</sup>H NMR, <sup>13</sup>C NMR, <sup>19</sup>F NMR data were obtained on AVANCE III Bruker 500 MHz or 400 MHz nuclear resonance spectrometers unless otherwise noted. Chemical shifts (in ppm) were referenced to tetramethylsilane (TMS) ( $\delta = 0.00$  ppm) in CDCl<sub>3</sub> or DMSO-d<sub>6</sub>. The data of <sup>1</sup>H NMR was reported as follows: chemical shift, multiplicity (s = singlet, d = doublet, t = triplet, m = multiplet), coupling constant (J values) in Hz and integration. <sup>13</sup>C NMR spectra were obtained by the same NMR spectrometers and were calibrated with CDCl<sub>3</sub> ( $\delta = 77.16$  ppm) or DMSO-d<sub>6</sub> ( $\delta = 39.50$  ppm). Flash chromatography was performed using 300-400 mesh silica gel with the indicated eluent according to standard techniques. Analysis of crude reaction mixture was done on an Agilent 7890 GC System with an Agilent 5975 Mass Selective Detector. High-resolution mass spectral (HRMS) data were recorded on Bruker APEX IV Fourier transform ion cyclotron resonance mass spectrometer using electrospray ionization (ESI) mode.

## 2. General procedure

### 2.1 General procedure for the synthesis of oxabenzonorbornadienes<sup>1</sup>

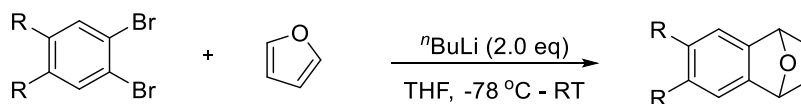

To a stirred solution of substituted 1,2-dibromobenzene (100 mmol) in anhydrous THF (200 mL) and freshly distilled furan (300 mmol) at -78 °C was added <sup>n</sup>BuLi (110 mmol, 1.1 equiv, 2.4 M in hexane) dropwise under N<sub>2</sub>. The solution was stirred at -78 °C for 1.5 h. Then, 100 mL distilled water was added to the reaction mixture and left to warm up to room temperature. EtOAc was added to the reaction mixture and the organic phase was separated. The aqueous solution was extracted with EtOAc and the combined organic solution was dried over MgSO<sub>4</sub>. The solvent was then removed in vacuo and the resulting mixture was purified by a flash silica gel column using a mixture of <sup>n</sup>hexane/EtOAc as eluent to give the desired pure compounds **1**.

## 2.2 General procedure for the synthesis of $\beta$ -acyl naphthalenes

To a 10 mL Schlenk tube was added sequentially NiBr<sub>2</sub>(DME) (6.2 mg, 0.02 mmol), 4,4'-di-*tert*-butyl-2,2'-bipyridine (6.0 mg, 0.024 mmol), Zn power (39.2 mg, 0.6 mmol) and oxabenzonorbornadiene **1** (0.20 mmol) was added in DMF or DMA (0.50 mL) under N<sub>2</sub>. Acyl chloride **2** (0.40 mmol) were added via syringe. The resulting solution was stirred at room temperature or 70 °C for 12 h. Then, the crude reaction mixture was diluted with ethyl acetate (10 mL) and washed with water (5 mL), extracted with EtOAc (5 mL x 3). The organic layer was dried over Na<sub>2</sub>SO<sub>4</sub>, filtered, and concentrated. The residue was purified by flash chromatography to give product **3**.

## 2.3 Procedure for the synthesis of **4**

A suspension of zinc (0.205 g, 4.0 eq) in dry THF (12 mL) was stirred under N<sub>2</sub> at 0 °C. Titanium tetrachloride (0.14 mL, 2.0 eq) was added slowly and the ice bath was removed. The mixture was heated to 70 °C for 3.5 hours. Then, 2-benzoylnaphthalene (0.116 g, 0.5 mmol, 1.0 eq) in THF (7 mL) was added. The mixture was stirred at 70 °C for overnight. The solution was cooled to room temperature and quenched with a saturated solution of aqueous ammonium chloride. Then, the mixture was extracted with chloroform, the organic phase dried over MgSO<sub>4</sub> and the solvent removed by evaporation. The product was obtained as white solid. The *E/Z*-isomers were separated by recrystallization from a mixture of hexane and toluene.

## 2.5 Procedure for the synthesis of **5**

A suspension of ethynyltrimethylsilane (160  $\mu$ L, 1.5 eq) in dry THF (10 mL) was stirred under N<sub>2</sub> at -78 °C. Then *n*BuLi (0.5 mL, 2.0 eq) was added slowly. The mixture was stirred for 1 hours. Then **3aa** (232mg, 1 mmol) was added. The mixture was stirred for another 3.5 hours under room temperature. 0.5 M KOH was added and the reaction was stirred for 15 min. Add the acid until the pH  $\approx$  7. Then, the mixture was extracted with EA, the organic phase dried over MgSO<sub>4</sub> and the solvent removed by evaporation. The product was obtained as oil liquid.

### 3. Optimization of the reaction conditions

#### 3.1 Table S1. Optimization of the temperature

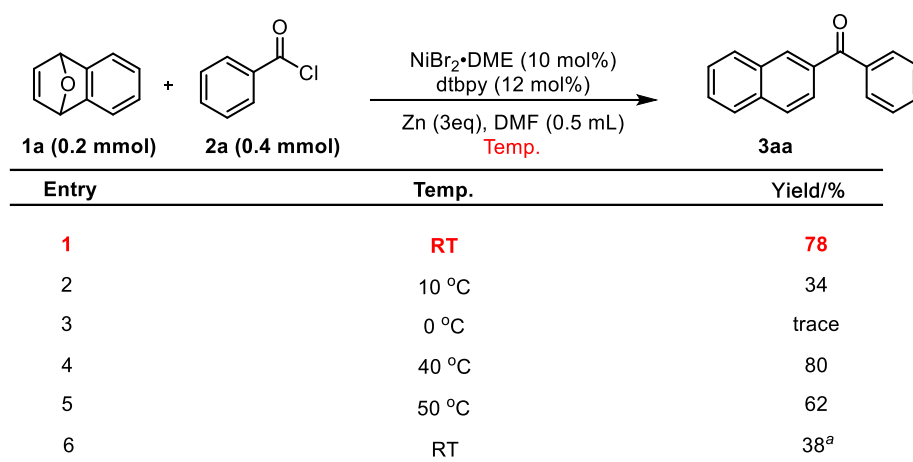

<sup>a</sup> with 5 mol% of NiBr<sub>2</sub>·DME and 6 mol% of dtbbpy

#### 3.2 Table S2. Optimization of the catalyst

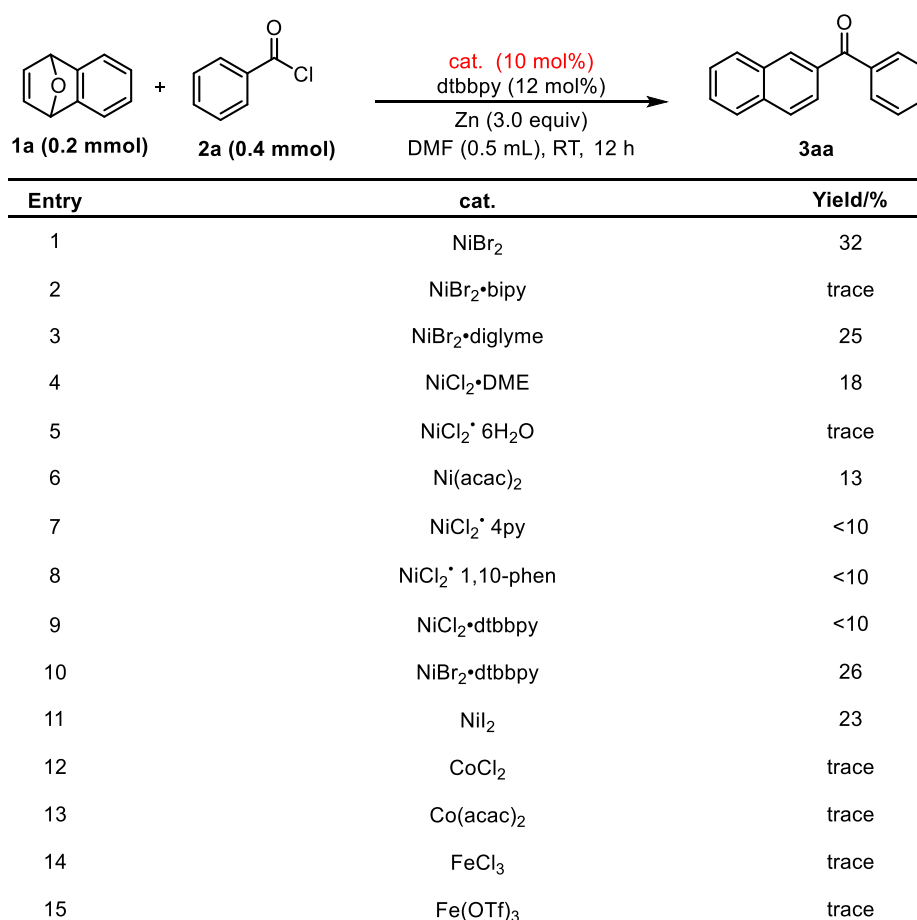

### 3.3 Table S3. Optimization of the ligand

| entry | Ligand                                            | Yield/% |
|-------|---------------------------------------------------|---------|
| 1     | bipy                                              | 49      |
| 2     | dimebpy                                           | 56      |
| 3     | tripy                                             | 23      |
| 4     | 4,4,4-tri-t-Bu-tripy                              | <10     |
| 5     | 2,9-dimephen                                      | <10     |
| 6     | 1,8-dimephen                                      | <10     |
| 7     | 4,7-dimephen                                      | <10     |
| 8     | 4,7-diph-phen                                     | <10     |
| 9     | Ph <sub>2</sub> PCH <sub>2</sub> PPh <sub>2</sub> | <10     |

### 3.4 Table S4. Optimization of the additive

| Entry | Additive          | Yield/% |
|-------|-------------------|---------|
| 1     | LiCl              | 55      |
| 2     | LiBr              | 63      |
| 3     | LiI               | 45      |
| 4     | LiF               | 60      |
| 5     | KI                | 52      |
| 6     | NaI               | 52      |
| 7     | MgF <sub>2</sub>  | 58      |
| 8     | MgCl <sub>2</sub> | 36      |
| 9     | pydine            | 32      |

### 3.5 Table S5. Optimization of the solvent

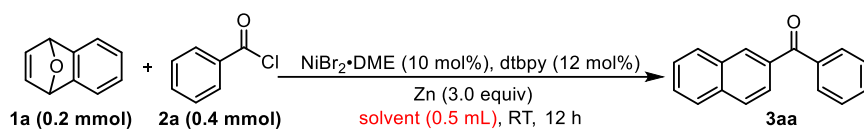

| Entry | Solvent            | Yield/% |
|-------|--------------------|---------|
| 1     | DMA                | <20     |
| 2     | DMSO               | <10     |
| 3     | THF                | 69      |
| 4     | dioxane            | <20     |
| 5     | CH <sub>3</sub> CN | <20     |
| 6     | NMP                | nd      |
| 7     | DCE                | <20     |
| 8     | DMF:THF/ 1:4       | 38      |

### 4. Characterization data for products

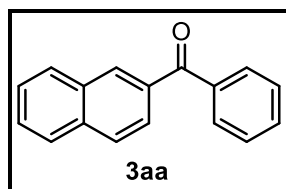

**Naphthalen-2-yl(phenyl)methanone (3aa)**<sup>2</sup> colorless oil, 78%

<sup>1</sup>H NMR (400 MHz, DMSO-d<sub>6</sub>) δ 8.31 (s, 1H), 8.09 (t, *J* = 8.0 Hz, 2H), 8.04 (d, *J* = 8.0 Hz, 1H), 7.88 (dd, *J*<sub>1</sub> = 8.0 Hz, *J*<sub>2</sub> = 2.0 Hz, 1H), 7.82 (dd, *J*<sub>1</sub> = 8.0 Hz, *J*<sub>2</sub> = 1.2 Hz, 2H), 7.73-7.67 (m, 2H), 7.63-7.57 (m, 3H). <sup>13</sup>C NMR (101 MHz, DMSO-d<sub>6</sub>) δ 195.9, 137.4, 134.9, 134.4, 132.8, 131.9, 131.5, 129.8, 129.6, 128.7, 128.5, 127.8, 127.1, 125.4. MS (EI) *m/z* (relative intensity): 232 (M<sup>+</sup>, 95), 155 (100), 127 (70).

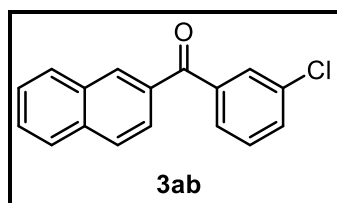

**(3-Chlorophenyl)(naphthalen-2-yl)methanone (3ab)**<sup>3</sup> colorless oil, 58%

<sup>1</sup>H NMR (400 MHz, DMSO-d<sub>6</sub>) δ 8.35 (s, 1H), 8.15-8.10 (m, 2H), 8.06 (d, *J* = 8.0 Hz, 1H), 7.90 (dd, *J*<sub>1</sub> = 8.4 Hz, *J*<sub>2</sub> = 1.6 Hz, 1H), 7.80-7.76 (m, 2H), 7.74-7.83 (m, 1H), 7.71-7.69 (m, 1H), 7.66-7.61 (m, 2H). <sup>13</sup>C NMR (101 MHz, DMSO-d<sub>6</sub>) δ 195.0, 139.8, 135.4, 134.2, 134.0, 132.8, 132.3,

132.2, 131.1, 130.1, 129.5, 129.3, 129.0, 128.9, 128.2, 127.6, 125.6. **MS** (EI)  $m/z$  (relative intensity): 266 ( $M^+$ , 55), 155 (100), 127 (55).

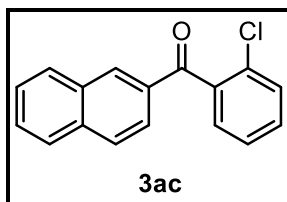

**(2-Chlorophenyl)(naphthalen-2-yl)methanone (3ac)**<sup>4</sup> colorless oil, 51%

**<sup>1</sup>H NMR** (400 MHz, DMSO- $d_6$ )  $\delta$  8.22 (s, 1H), 8.11 (d,  $J = 8.0$  Hz, 2H), 8.05 (d,  $J = 8.0$  Hz, 1H), 7.93 (dd,  $J_1 = 8.4$  Hz,  $J_2 = 1.6$  Hz, 1H), 7.73-7.70 (m, 1H), 7.66-7.63 (m, 2H), 7.62-7.60 (m, 1H), 7.59-7.58 (m, 1H), 7.58-7.57 (m, 1H). **<sup>13</sup>C NMR** (101 MHz, DMSO- $d_6$ )  $\delta$  194.7, 138.3, 135.5, 133.4, 132.6, 132.1, 131.9, 130.0, 130.0, 129.4, 129.3, 129.0, 127.9, 127.6, 127.3, 124.1. **MS** (EI)  $m/z$  (relative intensity): 266 ( $M^+$ , 55), 155 (100), 127 (55).

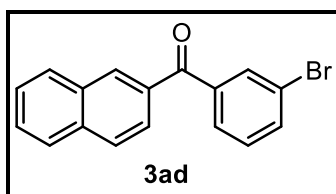

**(3-Bromophenyl)(naphthalen-2-yl)methanone (3ad)**<sup>5</sup> yellow oil, 49%

**<sup>1</sup>H NMR** (400 MHz, DMSO- $d_6$ )  $\delta$  8.35 (s, 1H), 8.15-8.10 (m, 2H), 8.06 (d,  $J = 8.0$  Hz, 1H), 7.94-7.91 (m, 2H), 7.89 (dd,  $J_1 = 8.4$  Hz,  $J_2 = 1.6$  Hz, 1H), 7.80 (dt,  $J_1 = 7.6$  Hz,  $J_2 = 1.2$  Hz, 1H), 7.73-7.69 (m, 1H), 7.65-7.62 (m, 1H), 7.59 (t,  $J = 8.0$  Hz, 1H). **<sup>13</sup>C NMR** (101 MHz, DMSO- $d_6$ )  $\delta$  194.6, 139.7, 135.3, 135.0, 133.8, 131.9, 131.9, 130.9, 129.8, 128.9, 128.8, 128.6, 127.8, 127.2, 125.2, 122.1, 99.6. **MS** (EI)  $m/z$  (relative intensity): 312 ( $M^+$ , 35), 155 (100), 127 (55).

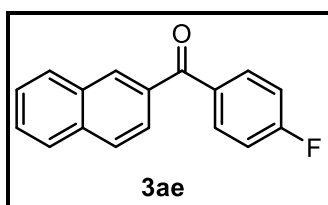

**(4-Fluorophenyl)(naphthalen-2-yl)methanone (3ae)**<sup>6</sup> yellow oil, 61%

**<sup>1</sup>H NMR** (400 MHz, DMSO- $d_6$ )  $\delta$  8.32 (s, 1H), 8.13-8.03 (m, 3H), 7.92-7.84 (m, 3H), 7.71-7.61 (m, 2H), 7.44-7.40 (m, 2H). **<sup>13</sup>C NMR** (101 MHz, DMSO- $d_6$ )  $\delta$  194.6, 164.8 ( $J = 252.5$  Hz), 134.9,

134.3, 134.0, 132.77 ( $J = 10.1$  Hz), 131.9, 131.4, 129.6, 128.7, 128.5, 127.8, 127.2, 125.3, 115.8 ( $J = 22.2$  Hz). **MS** (EI)  $m/z$  (relative intensity): 250 ( $M^+$ , 100), 155 (85), 127 (65).

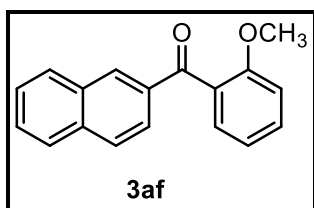

**(2-Methoxyphenyl)(naphthalen-2-yl)methanone (3af)**<sup>7</sup> yellow oil, 58%

**<sup>1</sup>H NMR** (400 MHz, DMSO- $d_6$ )  $\delta$  8.22 (s, 1H), 8.08-8.04 (m, 3H), 8.02 (dd,  $J_1 = 12.0$  Hz,  $J_2 = 2.0$  Hz, 1H), 7.86-7.84 (m, 1H), 7.69-7.65 (m, 2H), 7.61-7.56 (m, 1H), 7.41-8.38 (m, 1H), 7.24-7.12 (m, 1H), 3.67 (s, 3H). **<sup>13</sup>C NMR** (101 MHz, DMSO)  $\delta$  196.1, 157.3, 135.6, 135.0, 132.6, 132.5, 131.9, 130.2, 129.4, 129.3, 129.0, 128.8, 128.2, 127.4, 124.9, 121.1, 112.6, 56.1. **MS** (EI)  $m/z$  (relative intensity): 262 ( $M^+$ , 90), 135 (100), 127 (97).

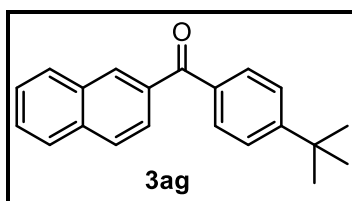

**[4-(tert-Butyl)phenyl](naphthalen-2-yl)methanone (3ag)**<sup>8</sup> colorless oil, 71%

**<sup>1</sup>H NMR** (400 MHz, DMSO- $d_6$ )  $\delta$  8.33 (s, 1H), 8.14-8.03 (m, 3H), 7.87 (dd,  $J_1 = 12.0$  Hz,  $J_2 = 2.0$  Hz, 1H), 7.79 (dt,  $J_1 = 8.4$  Hz,  $J_2 = 2$  Hz, 2H), 7.71-7.67 (m, 1H), 7.64-7.61 (m, 3H), 1.35 (s, 9H). **<sup>13</sup>C NMR** (101 MHz, DMSO)  $\delta$  195.5, 155.9, 134.8, 134.7, 134.6, 132.0, 131.2, 130.0, 129.6, 128.6, 128.4, 127.8, 127.1, 125.6, 125.5, 35.0, 31.0. **MS** (EI)  $m/z$  (relative intensity): 288 ( $M^+$ , 65), 273 (100), 161 (75).

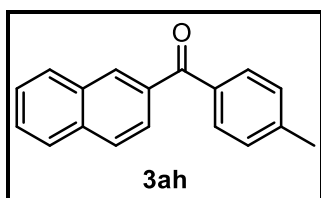

**Naphthalen-2-yl(p-tolyl)methanone (3ah)**<sup>9</sup> colorless oil, 70%

**<sup>1</sup>H NMR** (400 MHz, DMSO- $d_6$ )  $\delta$  8.29 (s, 1H), 8.11-8.02 (m, 3H), 7.86 (dd,  $J_1 = 12.0$  Hz,  $J_2 = 2.0$  Hz, 1H), 7.74-7.72 (m, 2H), 7.70-7.60 (m, 2H), 7.41(d,  $J = 8.0$  Hz, 2H), 2.43 (s, 3H). **<sup>13</sup>C NMR**



(101 MHz, DMSO- $d_6$ )  $\delta$  195.6, 143.2, 134.8, 134.7, 131.9, 131.2, 130.1, 129.6, 129.3, 128.6, 128.4, 127.8, 127.1, 125.4, 39.6, 21.3. **MS** (EI)  $m/z$  (relative intensity): 245 ( $M^+$ , 100), 127 (50), 91 (30).

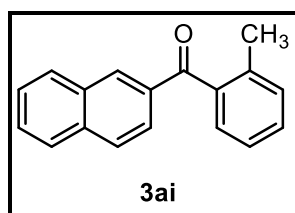

**Naphthalen-2-yl(o-tolyl)methanone (3ai)**<sup>7</sup> colorless oil, 69%

**<sup>1</sup>H NMR** (400 MHz,  $CDCl_3$ )  $\delta$  8.10 (s, 1H), 7.95-7.92 (m, 1H), 7.85-7.78 (m, 3H), 7.55 (dt,  $J_1 = 8.5$  Hz,  $J_2 = 1.5$  Hz, 1H), 7.53 (dt,  $J_1 = 8.5$  Hz,  $J_2 = 1.5$  Hz, 1H), 7.37-7.29 (m, 2H), 7.24-7.17 (m, 2H), 2.28 (s, 3H). **<sup>13</sup>C NMR** (101 MHz,  $CDCl_3$ )  $\delta$  198.6, 138.8, 136.7, 135.6, 135.0, 132.7, 132.4, 131.0, 130.2, 129.6, 128.6, 128.5, 128.4, 127.8, 126.8, 125.2, 125.0, 77.0, 20.0. **MS** (EI)  $m/z$  (relative intensity): 245 ( $M^+$ , 100), 127 (50), 91 (30).

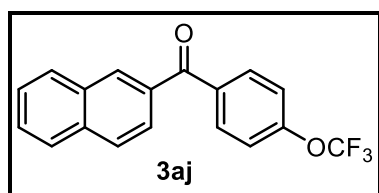

**Naphthalen-2-yl(4-(trifluoromethoxy)phenyl)methanone (3aj)** colorless oil, 67%

**<sup>1</sup>H NMR** (500 MHz, DMSO- $d_6$ )  $\delta$  8.35 (s, 1H), 8.14-8.09 (m, 2H), 8.05 (d,  $J = 4.0$  Hz, 1H), 7.97-7.94 (m, 2H), 7.89 (dd,  $J_1 = 10.0$  Hz,  $J_2 = 1.5$  Hz, 1H), 7.71-7.68 (m, 1H), 7.65-7.61 (m, 1H), 7.59 (d,  $J = 6.8$  Hz, 2H). **<sup>13</sup>C NMR** (126 MHz, DMSO- $d_6$ )  $\delta$  194.6, 151.2, 136.3, 135.0, 133.9, 132.2, 131.9, 131.7, 129.7, 128.8, 128.6, 127.8, 127.2, 125.3, 120.8, 120.3 (q,  $J = 259.3$  Hz). **<sup>19</sup>F NMR** (471 MHz, DMSO- $d_6$ )  $\delta$  -56.55. **MS** (EI)  $m/z$  (relative intensity): 316 ( $M^+$ , 90), 189 (65), 155 (100), 127 (65). **HRMS (ESI)**  $m/z$ : calcd for [ $M+H^+$ ]  $C_{18}H_{11}F_3O_2$ : 317.2867, found: 317.2865.

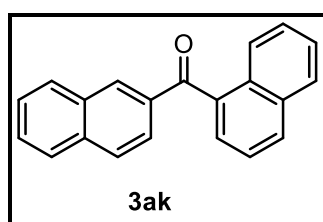

**Naphthalen-1-yl(naphthalen-2-yl)methanone (3ak)**<sup>10</sup> colorless oil, 50%

**<sup>1</sup>H NMR** (500 MHz, CDCl<sub>3</sub>) δ 8.26 (s, 1H), 8.13-8.04 (m, 3H), 7.97 (t, *J* = 5.5 Hz, 2H), 7.92 (d, *J* = 9.0 Hz, 1H), 7.84 (d, *J* = 8.0 Hz, 1H), 7.66 (d, *J* = 5.5 Hz, 1H), 7.63-7.49 (m, 5H). **<sup>13</sup>C NMR** (126 MHz, CDCl<sub>3</sub>) δ 198.0, 136.7, 135.8, 135.7, 133.8, 132.9, 132.4, 131.2, 131.1, 129.7, 128.7, 128.5, 128.4, 127.8, 127.7, 127.3, 126.8, 126.5, 125.8, 125.4, 124.4. **MS** (EI) *m/z* (relative intensity): 282 (M<sup>+</sup>, 85), 155 (95), 127 (100).

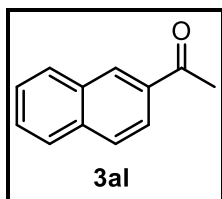

**1-(Naphthalen-2-yl)ethan-1-one (3al)**<sup>11</sup> colorless oil, 55%

**<sup>1</sup>H NMR** (500 MHz, CDCl<sub>3</sub>) δ 8.34 (s, 1H), 7.92 (dd, *J*<sub>1</sub> = 9.0 Hz, *J*<sub>2</sub> = 2.0 Hz, 1H), 7.84 (d, *J* = 8.0 Hz, 1H), 7.77 (m, 2H), 7.49 (m, 2H), 2.60 (s, 3H). **<sup>13</sup>C NMR** (126 MHz, CDCl<sub>3</sub>) δ 198.1, 135.6, 134.5, 132.5, 130.2, 129.6, 128.5, 128.4, 127.8, 126.8, 123.9, 26.7. **MS** (EI) *m/z* (relative intensity): 170 (M<sup>+</sup>, 65), 155 (95), 127 (100).

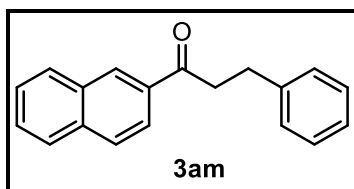

**1-(Naphthalen-2-yl)-3-phenylpropan-1-one (3am)**<sup>12</sup> colorless oil, 62%

**<sup>1</sup>H NMR** (500 MHz, CDCl<sub>3</sub>) δ 8.27 (s, 1H), 7.88 (dd, *J*<sub>1</sub> = 8.5 Hz, *J*<sub>2</sub> = 1.5 Hz, 1H), 7.75 (d, *J* = 8.0 Hz, 1H), 7.70 (t, *J* = 8.5 Hz, 2H), 7.42-7.34 (m, 2H), 7.18-7.13 (m, 4H), 7.08-7.06 (m, 1H), 3.26 (t, *J* = 7.0 Hz, 2H), 2.99 (t, *J* = 8.0 Hz, 2H). **<sup>13</sup>C NMR** (126 MHz, CDCl<sub>3</sub>) δ 199.1, 141.5, 135.6, 134.2, 132.6, 129.8, 129.6, 128.7, 128.6, 128.5, 128.4, 127.9, 126.9, 126.3, 123.9, 40.6, 30.3. **MS** (EI) *m/z* (relative intensity): 260 (M<sup>+</sup>, 45), 155 (100), 127 (60).

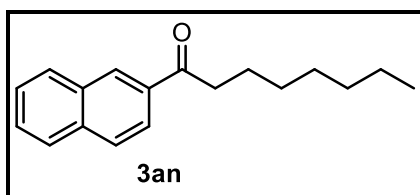

**1-(Naphthalen-2-yl)octan-1-one (3an)**<sup>13</sup>colorless oil, 65%

**<sup>1</sup>H NMR** (500 MHz, CDCl<sub>3</sub>) δ 8.38 (s, 1H), 7.96 (dd,  $J_1 = 8.5$  Hz,  $J_2 = 2.0$  Hz, 1H), 7.89 (d,  $J = 8.5$  Hz, 1H), 7.80 (t,  $J = 8.5$  Hz, 2H), 7.52-7.45 (m, 2H), 3.02-2.99 (t,  $J = 7.0$  Hz, 2H), 1.75-1.69 (m, 2H), 1.36-1.18 (m, 8H), 0.83-0.80 (m, 3H). **<sup>13</sup>C NMR** (126 MHz, CDCl<sub>3</sub>) δ 200.6, 135.5, 134.5, 132.6, 129.5, 128.3, 127.7, 126.7, 126.4, 124.0, 118.7, 38.7, 31.7, 29.4, 29.2, 24.6, 22.6, 14.1. **MS** (EI)  $m/z$  (relative intensity): 254 ( $M^+$ , 20), 170 (100), 155 (85), 127 (70).

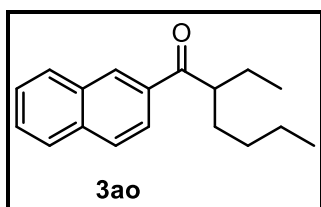

**2-Ethyl-1-(naphthalen-2-yl)hexan-1-one (3ao)** colorless oil, 75%

**<sup>1</sup>H NMR** (500 MHz, CDCl<sub>3</sub>) δ 8.38 (s, 1H), 7.96 (dd,  $J_1 = 6.8$  Hz,  $J_2 = 2.0$  Hz, 1H), 7.88 (d,  $J = 8.0$  Hz, 1H), 7.80 (m, 2H), 7.49 (m, 2H), 3.44 (m, 1H), 1.78 (m, 2H), 1.53 (m, 2H), 1.20 (m, 4H), 0.83-3.26 (t,  $J = 7.5$  Hz, 3H), 0.77 (t,  $J = 7.0$  Hz, 3H). **<sup>13</sup>C NMR** (126 MHz, CDCl<sub>3</sub>) δ 204.8, 135.7, 135.4, 132.8, 129.8, 129.3, 128.6, 128.5, 127.9, 126.8, 124.4, 47.8, 32.1, 30.0, 25.8, 23.1, 14.1, 12.2. **MS** (EI)  $m/z$  (relative intensity): 254 ( $M^+$ , 15), 155 (100), 127 (60). **HRMS (ESI)**  $m/z$ : calcd for [ $M+H^+$ ] C<sub>18</sub>H<sub>23</sub>O: 255.1743, found: 255.1745.

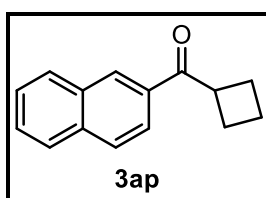

**Cyclobutyl(naphthalen-2-yl)methanone (3ap)**<sup>14</sup> colorless oil, 62%

**<sup>1</sup>H NMR** (500 MHz, CDCl<sub>3</sub>) δ 8.38 (s, 1H), 8.00 (dd,  $J_1 = 10.0$  Hz,  $J_2 = 2$  Hz, 2H), 7.89 (t,  $J = 9.0$  Hz, 2H), 7.60-7.53 (m, 2H), 4.20-4.13 (m, 1H), 2.52-2.45 (m, 2H), 2.40-2.34 (m, 2H), 2.18-2.11 (m, 1H), 1.98-1.92 (m, 1H). **<sup>13</sup>C NMR** (126 MHz, CDCl<sub>3</sub>) δ 201.0, 135.5, 133.0, 132.6, 129.9, 129.5,

128.4, 128.3, 127.8, 126.7, 124.2, 42.3, 25.3, 18.3. **MS** (EI)  $m/z$  (relative intensity): 210 ( $M^+$ , 25), 155 (100), 127 (60).

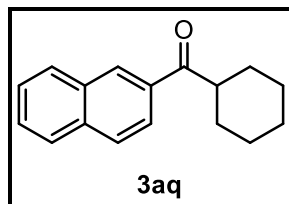

**Cyclohexyl(naphthalen-2-yl)methanone (3aq)**<sup>15</sup> colorless oil, 52%

**<sup>1</sup>H NMR** (500 MHz,  $CDCl_3$ )  $\delta$  8.46 (s, 1H), 8.03 (dd,  $J_1 = 9.0$  Hz,  $J_2 = 2$  Hz, 1H), 7.98 (d,  $J = 8.0$  Hz, 1H), 7.90 (m, 2H), 7.61 (m, 2H), 3.46 (tt,  $J_1 = 11.5$  Hz,  $J_2 = 3.5$  Hz, 1H), 1.97 (m, 2H), 1.90 (m, 2H), 1.63 (m, 2H), 1.50 (qt,  $J_1 = 12.5$  Hz,  $J_2 = 3.0$  Hz, 2H), 1.35-1.26 (m, 2H). **<sup>13</sup>C NMR** (126 MHz,  $CDCl_3$ )  $\delta$  203.9, 135.5, 133.7, 132.6, 129.6, 129.6, 128.4, 128.3, 127.7, 126.7, 124.4, 45.7, 29.6, 26.0, 25.9. **MS** (EI)  $m/z$  (relative intensity): 235 ( $M^+$ , 25), 155 (100), 127 (55).

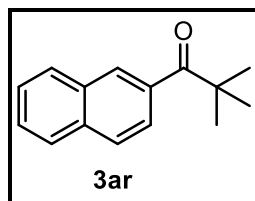

**2,2-Dimethyl-1-(naphthalen-2-yl)propan-1-one (3ar)**<sup>16</sup> colorless oil, 59%

**<sup>1</sup>H NMR** (500 MHz,  $CDCl_3$ )  $\delta$  8.32 (s, 1H), 7.94 (dd,  $J_1 = 9.0$  Hz,  $J_2 = 2.0$  Hz, 1H), 7.87 (d,  $J = 8.0$  Hz, 1H), 7.78 (m, 2H), 7.48 (m, 2H), 1.14 (s, 9H). **<sup>13</sup>C NMR** (126 MHz,  $CDCl_3$ )  $\delta$  198.1, 135.6, 134.6, 132.5, 130.2, 129.5, 128.5, 128.4, 127.8, 126.8, 123.9, 46.3, 30.1. **MS** (EI)  $m/z$  (relative intensity): 212 ( $M^+$ , 65), 155 (100), 127 (55).

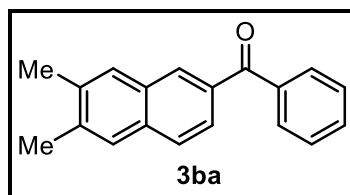

**(6,7-Dimethylnaphthalen-2-yl) (phenyl)methanone (3ba)**<sup>17</sup> colorless oil, 76%

**<sup>1</sup>H NMR** (400 MHz, CDCl<sub>3</sub>) δ 8.05 (s, 1H), 7.78-7.69 (m, 4H), 7.54-7.48 (m, 3H), 7.42-7.38 (m, 2H), 2.35 (s, 3H), 2.32 (s, 3H). **<sup>13</sup>C NMR** (101 MHz, CDCl<sub>3</sub>) δ 197.0, 138.7, 138.2, 136.7, 134.3, 134.0, 132.2, 131.3, 131.1, 130.1, 128.9, 128.3, 127.4, 127.3, 125.1, 20.5, 20.2. **MS** (EI) *m/z* (relative intensity): 260 (M<sup>+</sup>, 75), 183 (100), 155 (30).

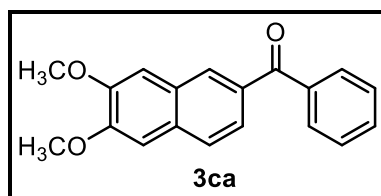

**(6,7-Dimethoxynaphthalen-2-yl)(phenyl)methanone (3ca)** colorless oil, 72%

**<sup>1</sup>H NMR** (400 MHz, CDCl<sub>3</sub>) δ 8.02 (s, 1H), 7.79-7.66 (m, 4H), 7.57-7.41 (m, 3H), 7.43-7.36 (m, 2H), 3.73 (s, 3H), 3.71 (s, 3H). **<sup>13</sup>C NMR** (101 MHz, CDCl<sub>3</sub>) δ 198.6, 138.8, 136.8, 135.6, 132.6, 131.0, 130.2, 129.6, 128.7, 128.5, 128.4, 127.8, 126.8, 125.2, 125.1, 20.5, 20.2. **HRMS (ESI)** *m/z*: calcd for [M+H<sup>+</sup>] C<sub>19</sub>H<sub>16</sub>O<sub>3</sub> 293.1172, found: 293.1179.

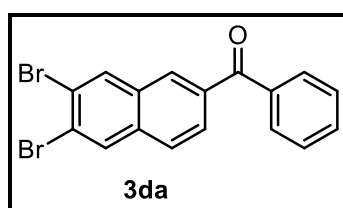

**(6,7-Dibromonaphthalen-2-yl)(phenyl)methanone (3da)**<sup>17</sup> yellow oil, 51%

**<sup>1</sup>H NMR** (400 MHz, CDCl<sub>3</sub>) δ 8.65 (s, 1H), 8.38-8.20 (m, 4H), 8.15-8.08 (m, 3H), 8.04-7.93 (m, 2H). **<sup>13</sup>C NMR** (101 MHz, CDCl<sub>3</sub>) δ 198.9, 142.3, 141.9, 137.1, 136.9, 133.8, 132.5, 131.7, 130.6, 128.5, 128.4, 128.1, 127.7, 126.32, 126.1. **HRMS (ESI)** *m/z*: calcd for [M+H<sup>+</sup>] C<sub>17</sub>H<sub>10</sub>OBr<sub>2</sub>: 388.9171, found: 388.9191.

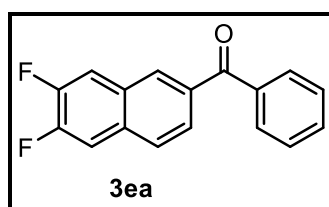

**(6,7-Difluoronaphthalen-2-yl)(phenyl)methanone (3ea)**<sup>17</sup> yellow oil, 41%

**<sup>1</sup>H NMR** (400 MHz, CDCl<sub>3</sub>) δ 8.72 (s, 1H), 8.46-8.21 (m, 4H), 8.16-8.02 (m, 3H), 8.01-7.94 (m, 2H). **<sup>13</sup>C NMR** (101 MHz, CDCl<sub>3</sub>) δ 200.0, 151.1 (*J* = 218.2 Hz), 151.0 (d, *J* = 218.2 Hz), 142.0,

141.9, 139.8 ( $J = 31.3$  Hz), 138.9 ( $J = 27.3$  Hz), 137.7, 136.8, 136.2, 135.0, 134.4, 133.2, 132.3 (d,  $J = 29.3$  Hz), 131.6 ( $J = 29.3$  Hz). **MS** (EI)  $m/z$  (relative intensity): 268 ( $M^+$ , 75), 191 (70), 105 (100).

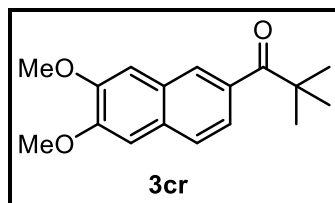

**1-(6,7-Dimethoxynaphthalen-2-yl)-2,2-dimethylpropan-1-one (3cr)**<sup>18</sup> colorless oil, 68%

**<sup>1</sup>H NMR** (400 MHz, CDCl<sub>3</sub>)  $\delta$  8.14 (s, 1H), 7.73-7.67 (m, 2H), 7.18 (s, 1H), 7.12 (s, 1H), 4.10-4.00 (m, 6H), 1.43 (s, 9H). **<sup>13</sup>C NMR** (101 MHz, CDCl<sub>3</sub>)  $\delta$  208.5, 151, 150.0, 133.9, 130.69, 128.1, 127.4, 126.0, 123.7, 107.3, 106.0, 56.0, 56.0, 44.3, 28.4. **HRMS (ESI)**  $m/z$ : calcd for [ $M+H^+$ ] C<sub>17</sub>H<sub>20</sub>O<sub>3</sub> 273.1485, found: 273.1490.

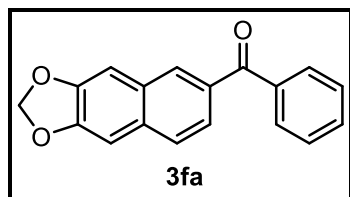

**Naphtho[2,3-d][1,3]dioxol-6-yl(phenyl)methanone (3ea)**<sup>18</sup> colorless oil, 75%

**<sup>1</sup>H NMR** (500 MHz, CDCl<sub>3</sub>)  $\delta$  8.10 (s, 1H), 7.85 (d,  $J = 6.0$  Hz, 2H), 7.80-7.78 (m, 1H), 7.74-7.72 (m, 1H), 7.62-7.59 (m, 1H), 7.52-7.49 (m, 2H), 7.17 (d,  $J = 2.5$  Hz, 2H), 6.08 (s, 2H). **<sup>13</sup>C NMR** (126 MHz, CDCl<sub>3</sub>)  $\delta$  196.7, 149.7, 148.4, 138.2, 133.5, 133.2, 132.2, 130.7, 130.0, 129.4, 128.3, 127.1, 124.9, 105.1, 103.9, 101.5. **MS** (EI)  $m/z$  (relative intensity): 276 ( $M^+$ , 70), 199 (100), 171 (25), 77 (25).

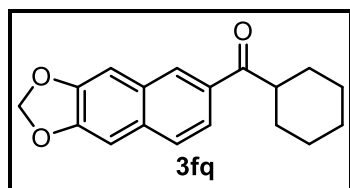

**Cyclohexyl(naphtho[2,3-d][1,3]dioxol-6-yl)methanone (3fq)** colorless oil, 65%

**<sup>1</sup>H NMR** (500 MHz, CDCl<sub>3</sub>) δ 8.26 (s, 1H), 7.87 (dd,  $J_1 = 8.5$  Hz,  $J_2 = 1.5$  Hz, 1H), 7.69 (d,  $J = 8.5$  Hz, 1H), 7.22 (s, 1H), 7.13 (s, 1H), 6.07 (s, 2H), 3.40 (tt,  $J_1 = 11.0$  Hz,  $J_2 = 3.0$  Hz, 1H), 1.94-1.91 (m, 2H), 1.88-1.85 (m, 2H), 1.58-1.51 (m, 2H), 1.48 (qt,  $J_1 = 9.5$  Hz,  $J_2 = 3.0$  Hz, 2H), 1.34-1.25 (m, 2H). **<sup>13</sup>C NMR** (126 MHz, CDCl<sub>3</sub>) δ 203.8, 149.6, 148.2, 133.3, 132.4, 129.8, 128.4, 127.3, 123.3, 105.2, 103.8, 101.5, 45.6, 29.6, 26.0, 25.9. **MS** (EI)  $m/z$  (relative intensity): 282 (M<sup>+</sup>, 20), 199 (100), 171 (20). **HRMS (ESI)**  $m/z$ : calcd for [M+H<sup>+</sup>] C<sub>18</sub>H<sub>19</sub>O<sub>3</sub>: 283.1329, found: 283.1342.

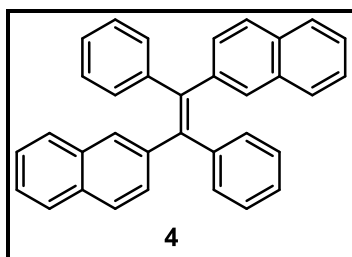

**(E)-1,2-di(naphthalen-2-yl)-1,2-diphenylethene (4)** yellow solid, 68%

**<sup>1</sup>H NMR** (500 MHz, CDCl<sub>3</sub>) δ 7.63 (d,  $J = 8.0$  Hz, 1H), 7.58 (d,  $J = 8.0$  Hz, 1H), 7.50-7.44 (m, 5H), 7.40 (d,  $J = 9.0$  Hz, 1H), 7.30-7.22 (m, 4H), 7.13-7.10 (m, 2H), 7.04-6.97 (m, 10H). **<sup>13</sup>C NMR** (126 MHz, CDCl<sub>3</sub>) δ 144.0, 143.8, 141.5, 141.4, 141.4, 141.3, 133.2, 132.2, 131.6, 131.6, 130.6, 129.6, 128.1, 128.1, 127.9, 127.8, 127.5, 127.5, 127.1, 127.0, 126.7, 126.6, 125.8, 125.8, 125.8, 125.7.

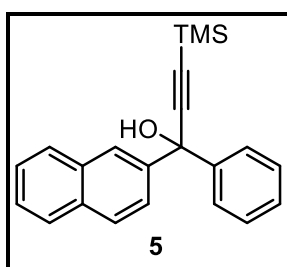

**1-(Naphthalen-2-yl)-1-phenyl-3-(trimethylsilyl) prop-2-yn-1-ol (5)** colorless oil, 54%

**<sup>1</sup>H NMR** (500 MHz, CDCl<sub>3</sub>) δ 8.07 (s, 1H), 7.74-7.72 (m, 1H), 7.68-7.63 (m, 2H), 7.56-7.54 (m, 2H), 7.48 (dd,  $J_1 = 8.5$  Hz,  $J_2 = 2.0$  Hz, 1H), 7.37-7.32 (m, 2H), 7.22-7.19 (m, 2H), 7.16-7.12 (m, 1H), 2.88 (s, 1H), 0.15 (s, 9H). **<sup>13</sup>C NMR** (126 MHz, CDCl<sub>3</sub>) δ 144.5, 142.0, 132.9, 132.79, 128.49, 128.29, 128.1, 127.7, 127.5, 126.2, 126.1, 124.6, 124.2, 107.65, 92.3, 74.7, -0.1.

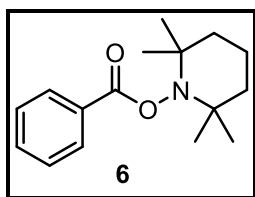

**2,2,6,6-tetramethylpiperidin-1-yl benzoate (6)** colorless oil.

<sup>1</sup>H NMR (400 MHz, CDCl<sub>3</sub>) δ 8.09-8.06 (m, 2H), 7.59-7.55 (m, 1H), 7.48-7.44 (m, 2H), 1.59 (s, 2H), 1.57 (s, 2H), 1.28 (s, 6H), 1.25 (s, 2H), 1.12 (s, 6H). <sup>13</sup>C NMR (101 MHz, CDCl<sub>3</sub>) δ 169.6, 166.4, 132.8, 129.7, 128.4, 69.0, 60.4, 39.1, 32.0, 20.8, 17.0.

### Reaction with monosubstituted oxabicyclic alkene

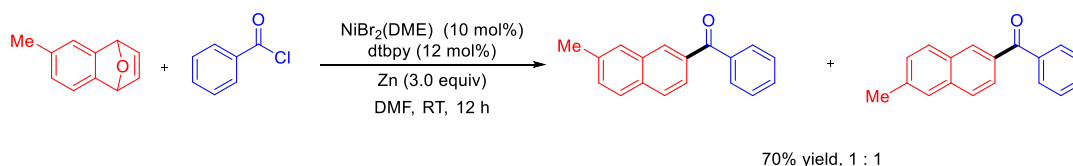

### Reactions with TEMPO or BHT as radical inhibitor

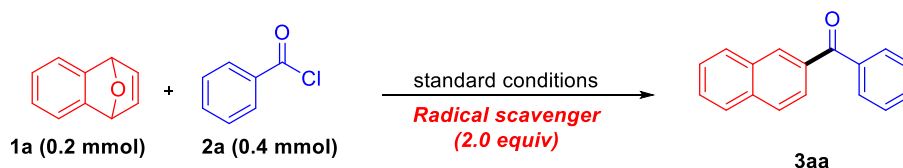

| Radical scavenger | GC Yield (%) |
|-------------------|--------------|
| none              | 78%          |
| TEMPO             | trace        |
| BHT               | 36%          |

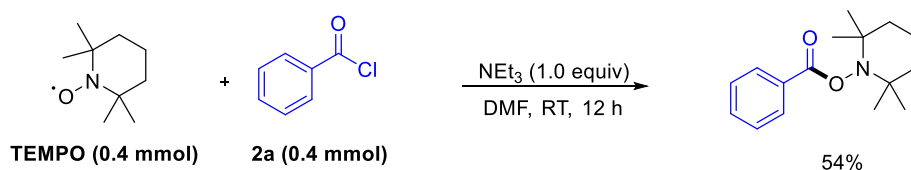

The reactions with radical inhibitor TEMPO and BHT gave significantly decreased yields. However, the reaction of TEMPO with acid chloride could occur without any catalyst, ligand and reductant. Therefore, the studies with TEMPO or BHT as radical inhibitor is not useful for the understanding of the reaction mechanism.



## Reactions with methyl chloroformate or dimethylcarbamoyl chloride

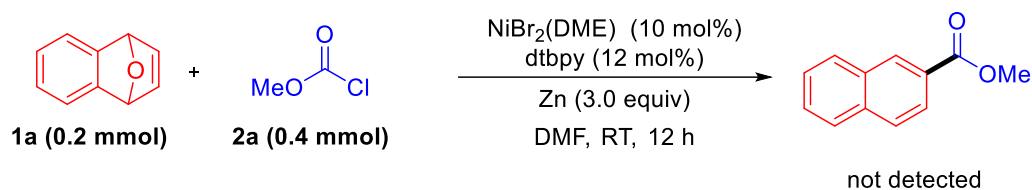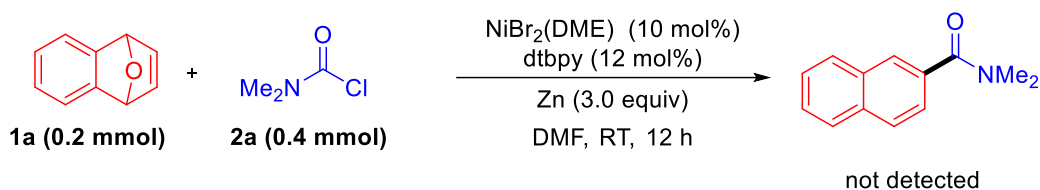

## Reactions with acyl fluoride or acid anhydride instead of acyl chloride

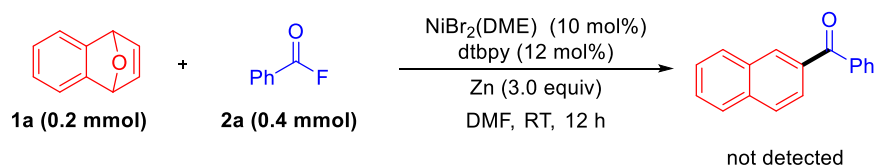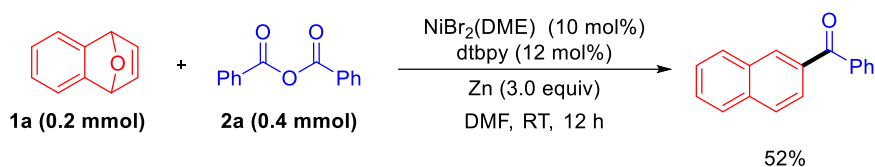

## Reference

1. M. Cui and M. Oestreich, *Org. Lett.*, 2020, **22**, 3684–3687.
2. S.-Y. Yang, X. Yu and M. Szostak, *ACS Catal.*, 2023, **13**, 1848–1855
3. R. S. Cahn, W. O. Jones and J. L. Simonse, *J. Chem. Soc.*, 1933, 444-449
4. Y.-Z. Sui, X.-C. Zhang, J.-W. Wu, S.-J. Li, J.-N. Zhou, M. Li, W.-J. Fang, A. S. C. Chan and J. Wu, *Chem. Eur. J.*, 2012, **18**, 7486–7492
5. C. Li, K. Xu and Z.-C. Zhang, China, CN106279203A
6. R.-H. Li, F.-P Liu and G.-B. Dong, *Chem*, 2019, **5**, 929-939.
7. S.-C. Shi and M. Szostak, *Org. Lett.*, 2016, **18**, 5872–5875
8. L.-X. Wang, J. Lin, C.-G. Xia and W. Sun, *J. Catal.*, 2022, **413**, 487–497.

9. J.-J. Hang and X.-F. Wu, *Org. Lett.*, 2023, **25**, 2162–2166
10. Anup Rana and Henrik Ottosson *et al*, *Green Chem.*, 2022, **24**, 9602-9619
11. Z. Wang *et al*, *J. Catal.*, 2024, **430**, 115337-11545
12. X.-C. Wang, F.-P. Liu, Z.-J Yan, Q. Qiang, W. Huang and Z.-Q. Rong, *ACS Catal.*, 2021, **11**, 7319–7326
13. D.-Y. Wei, B.-J. Feng, Q. Chen, W.-T. Yue, Y.-L. Wang and Z.-H. Peng, *Org. Chem. Front.*, 2024, **11**, 1955-1962
14. P. Rai, K. Maji, S. K. Jana and B. Maji, *Chem. Sci.*, 2022, **13**, 12503-12510
15. W.-C. Liu, X. Zhang, L. Chen, R. Zeng, Y.-H. Tian, E.-D. Ma, Y.-P. Wang, B. Zhang and J.-L. Li, *ACS Catal.*, 2024, **14**, 3181–3190
16. T. Ishii, Y. Kakeno, K. Nagao and H. Ohmiya, *J. Am. Chem. Soc.*, 2019, **141**, 3854–3858
17. Z.-Q. Liu and Y.-T. Huang, CN115785007A.
18. T. Lauterbach, S. Arndt, M. Rudolph, F. Rominger and A. S. K. Hashmi, *Adv. Synth. Catal.*, 2013, **355**, 1755–1761

# NMR spectrum

3aa

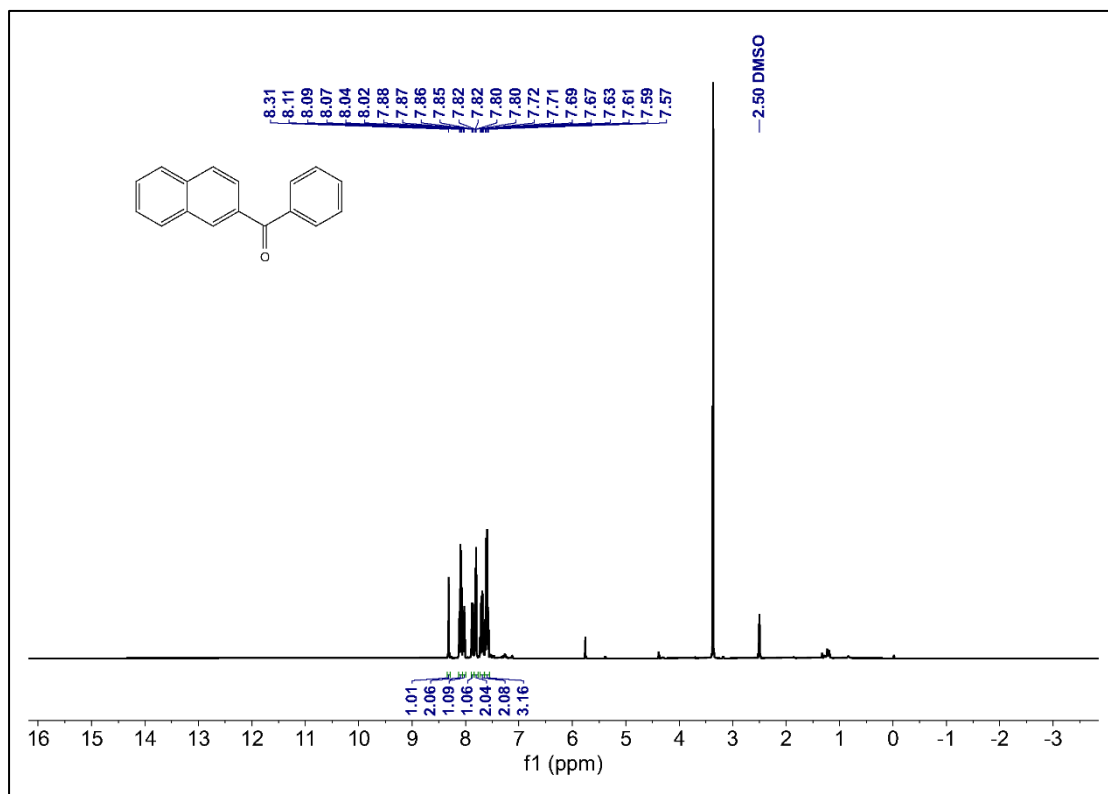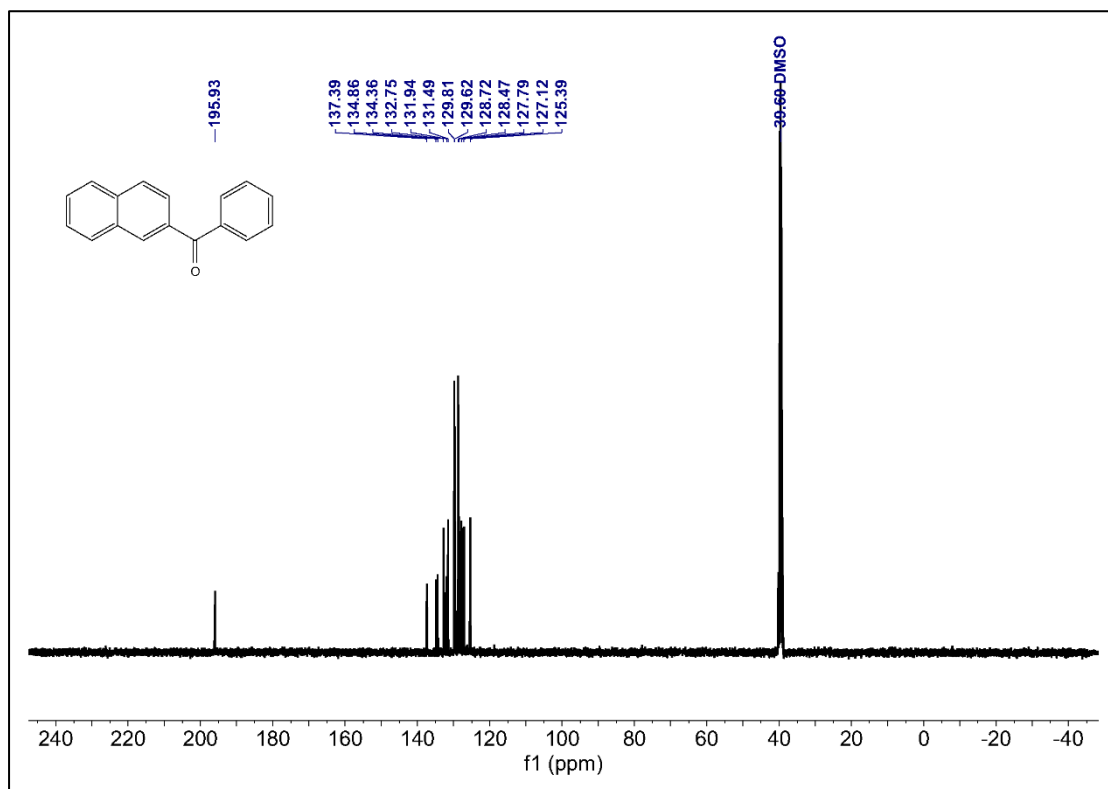

3ab

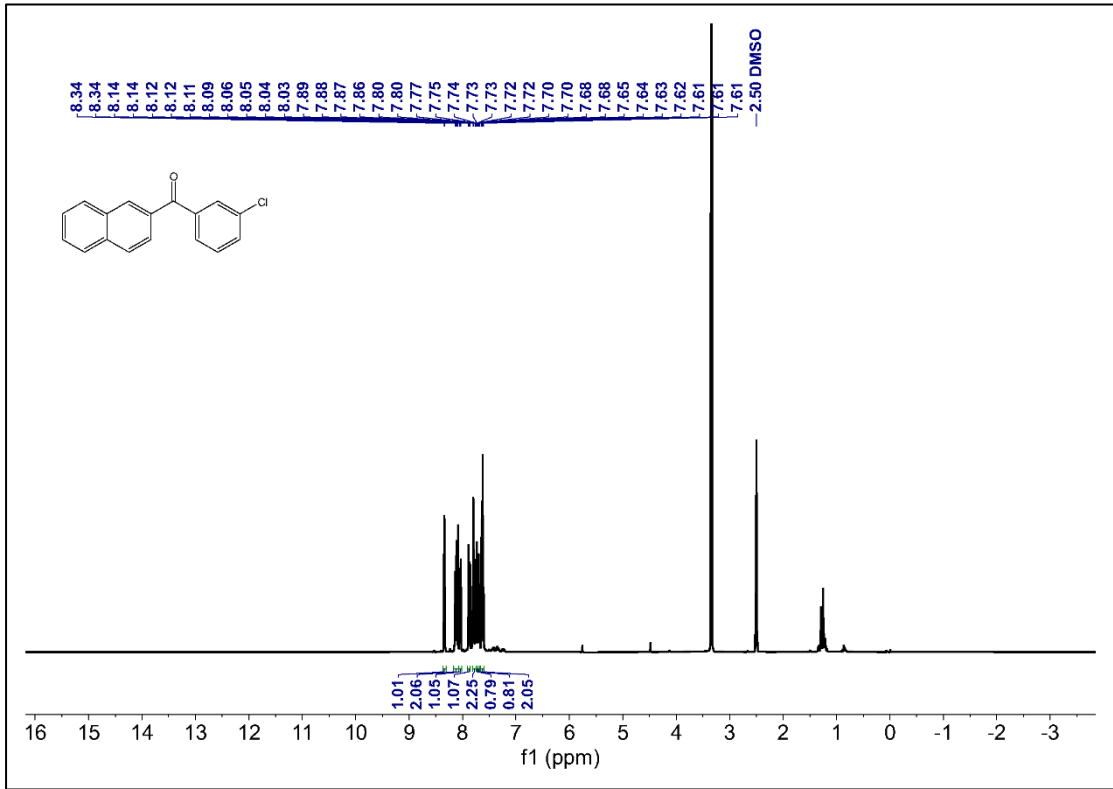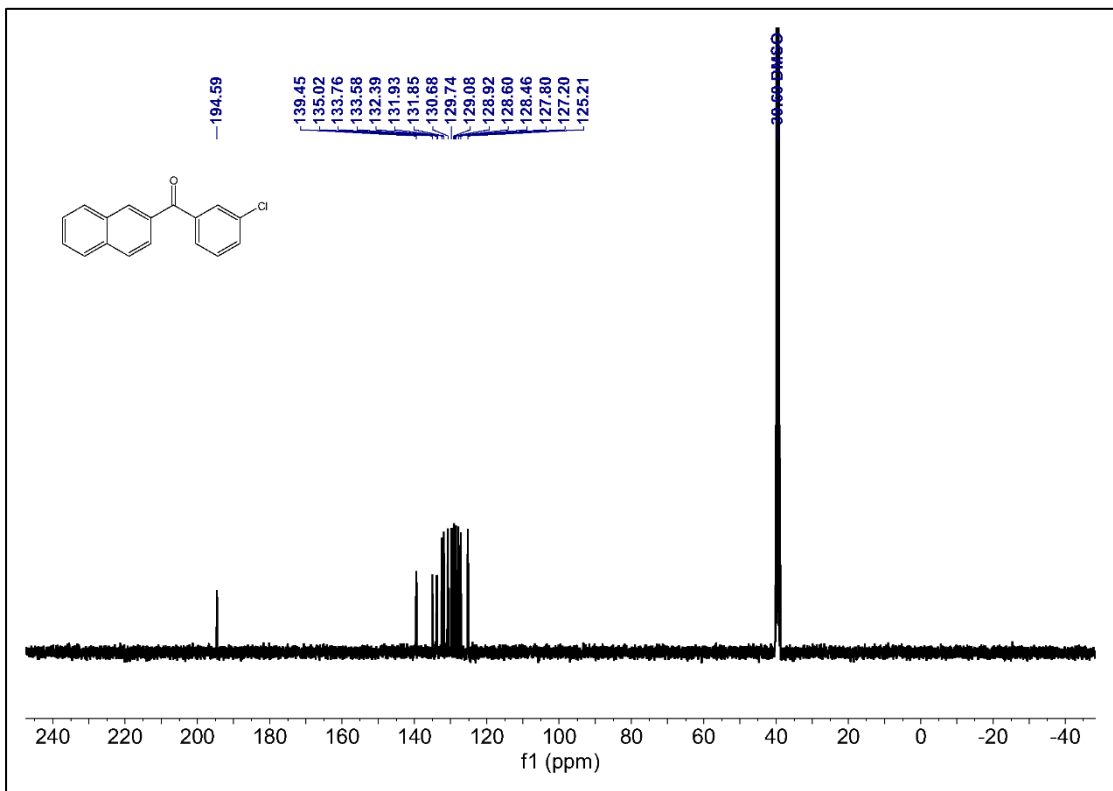

3ac

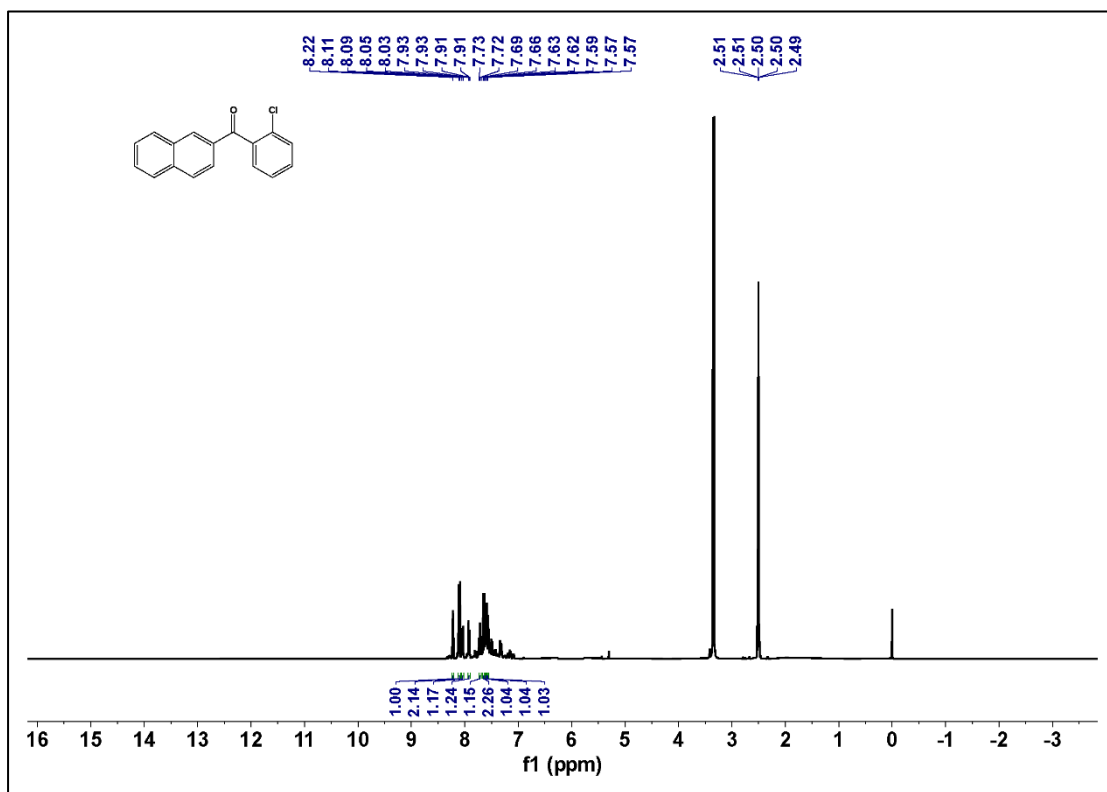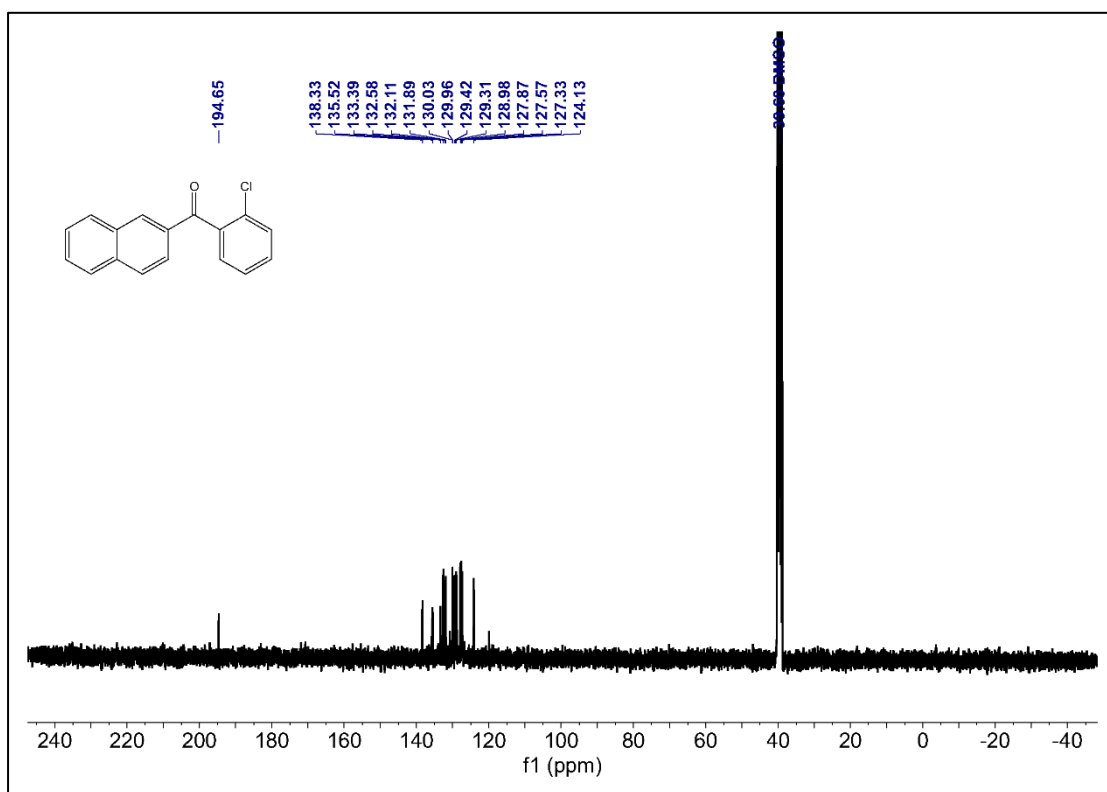



3ae

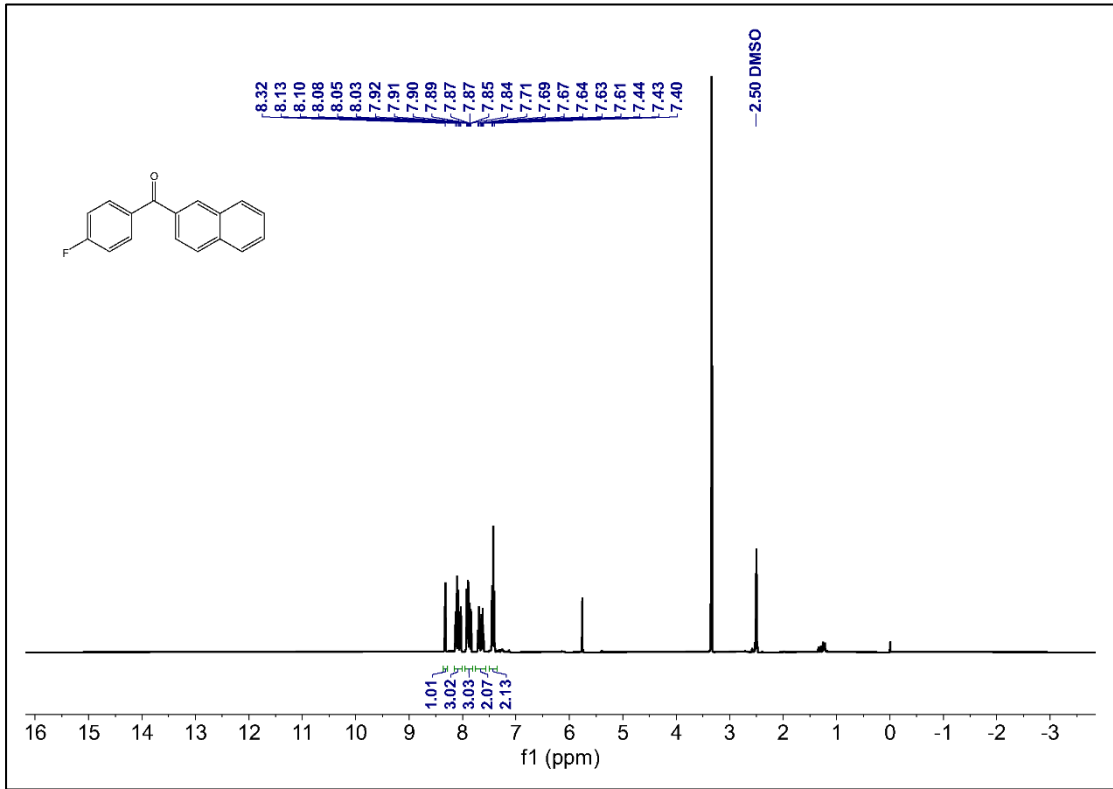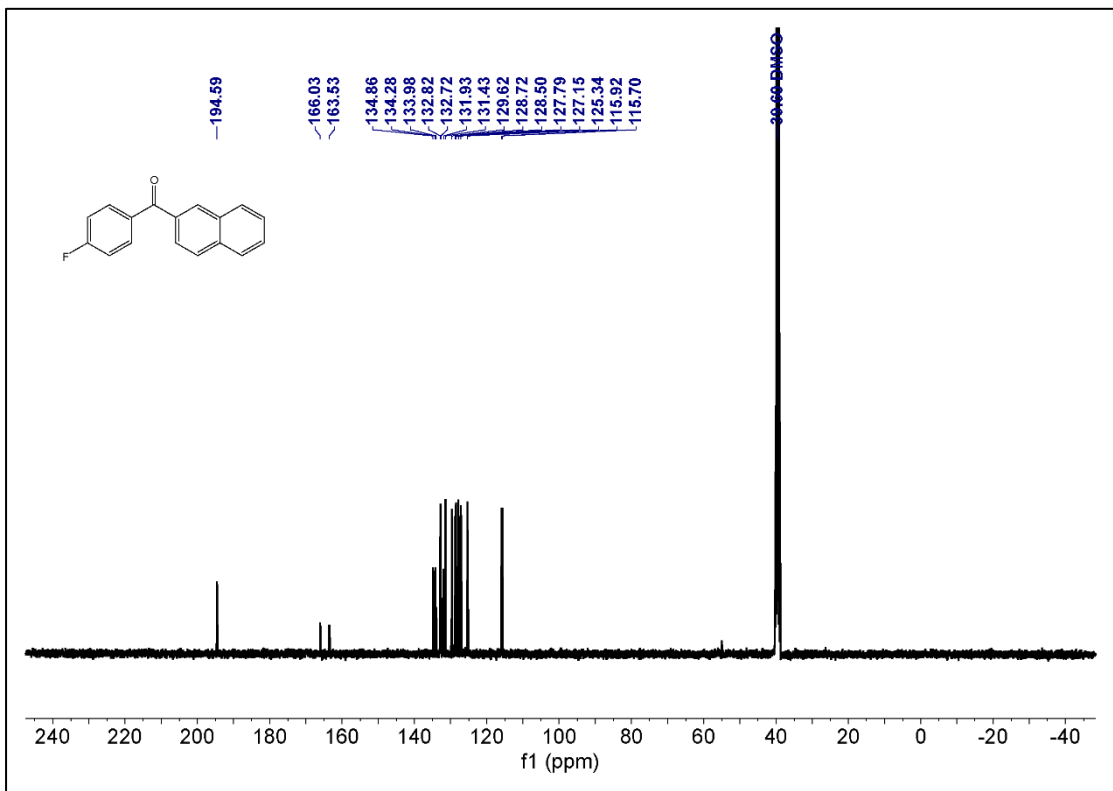

3af

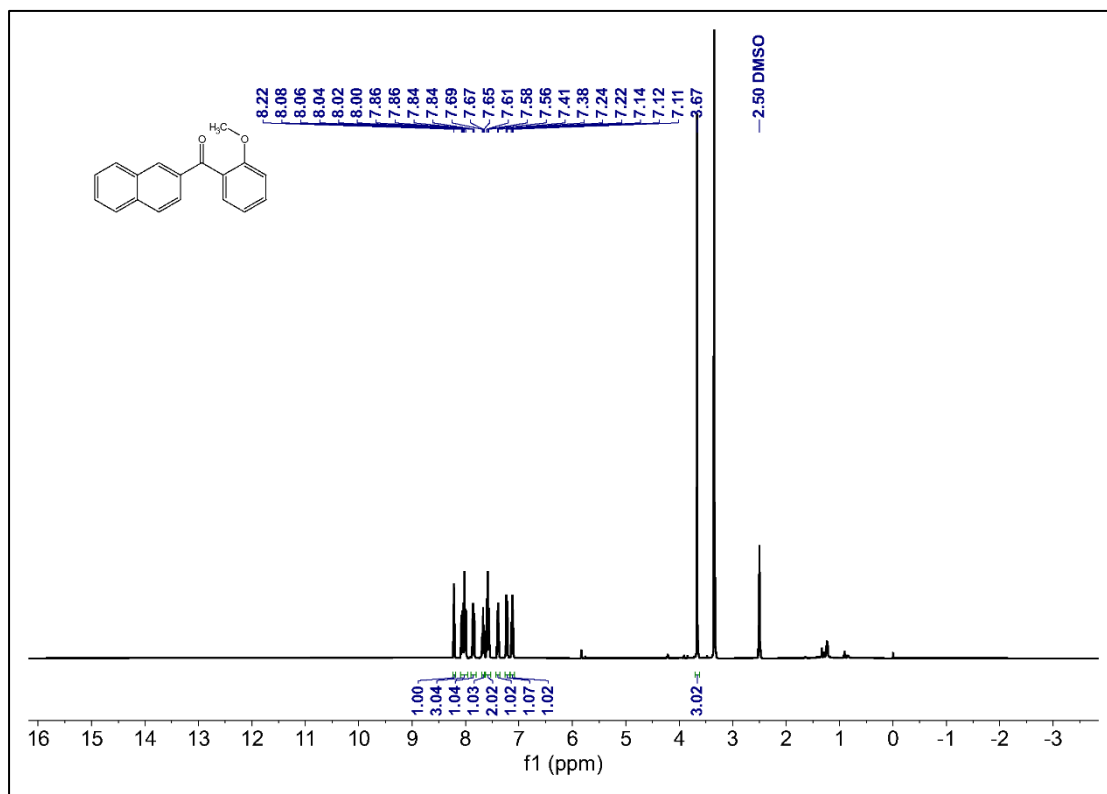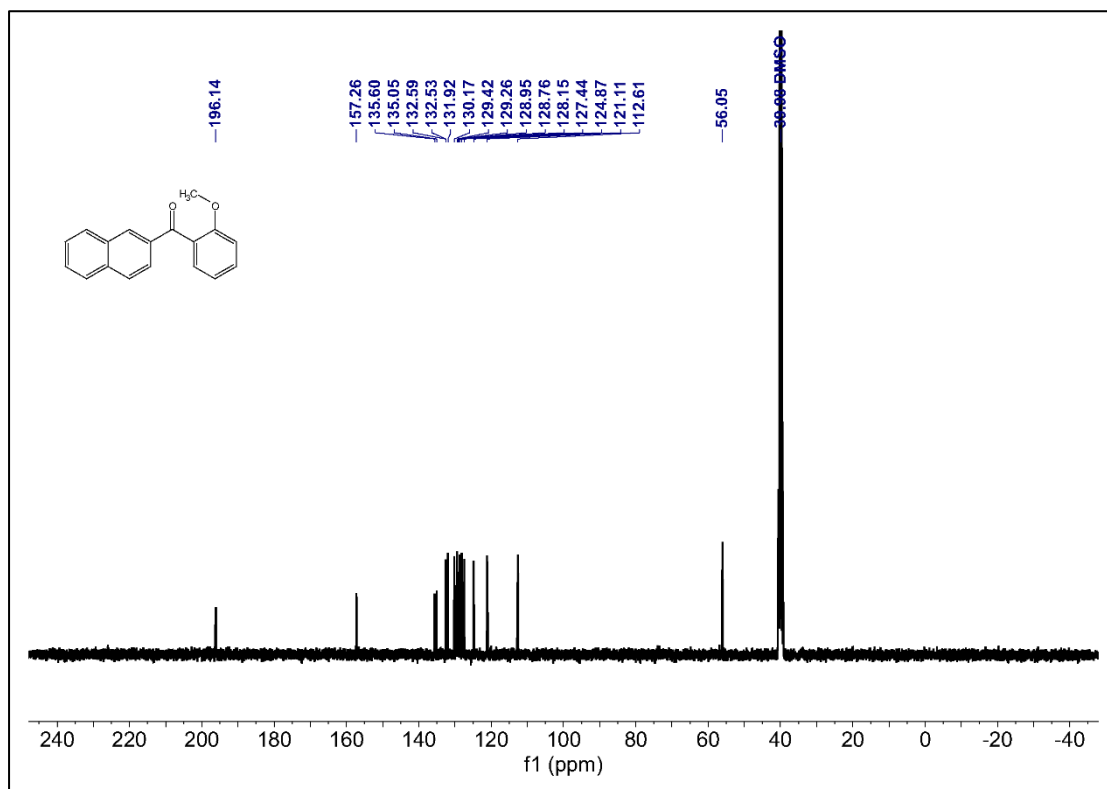



3ag

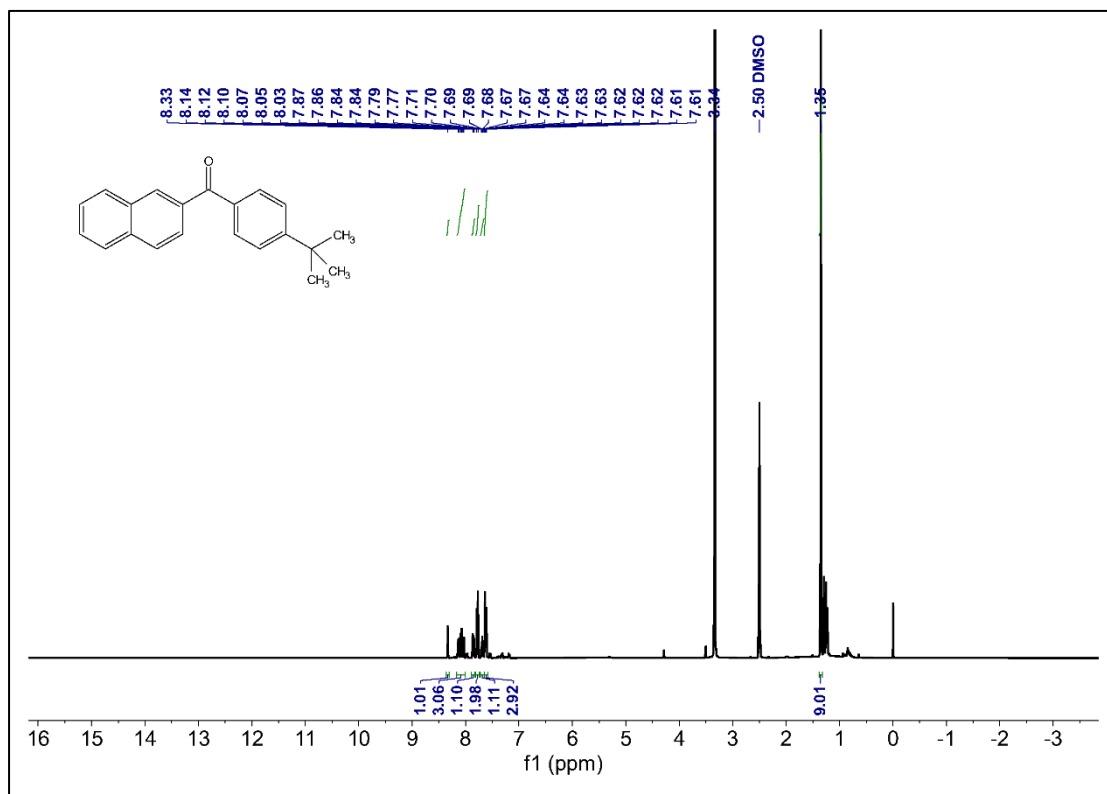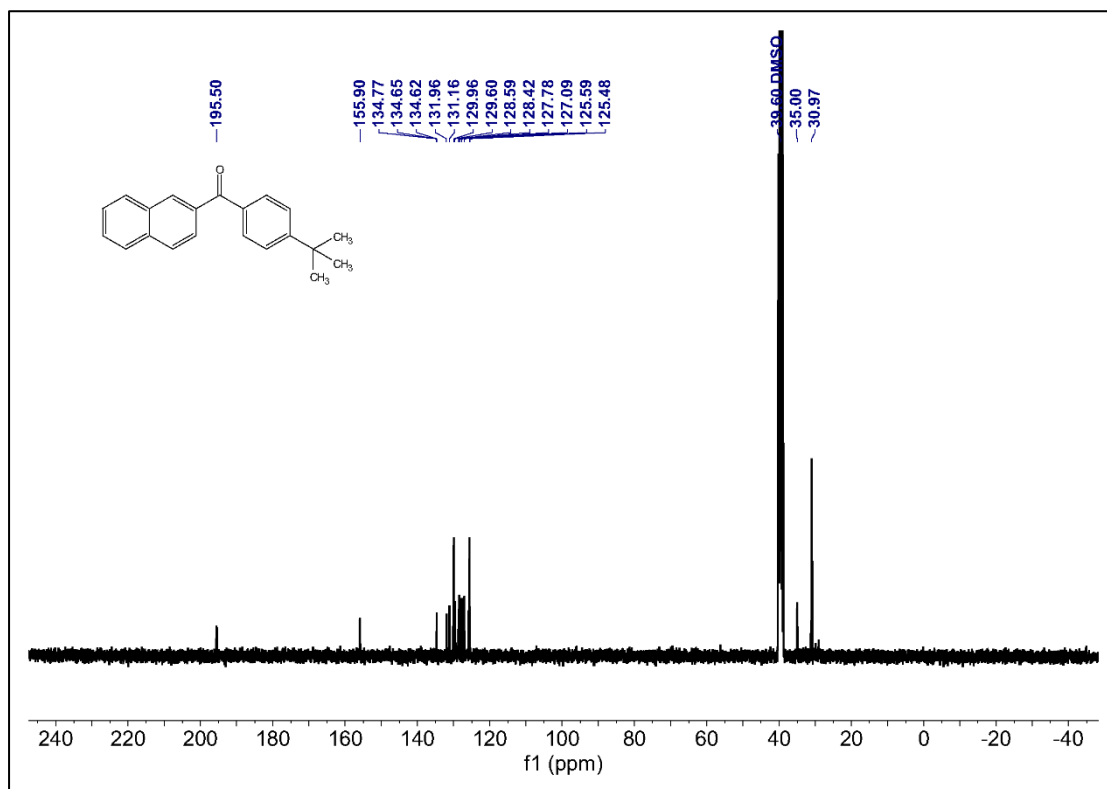

3ah

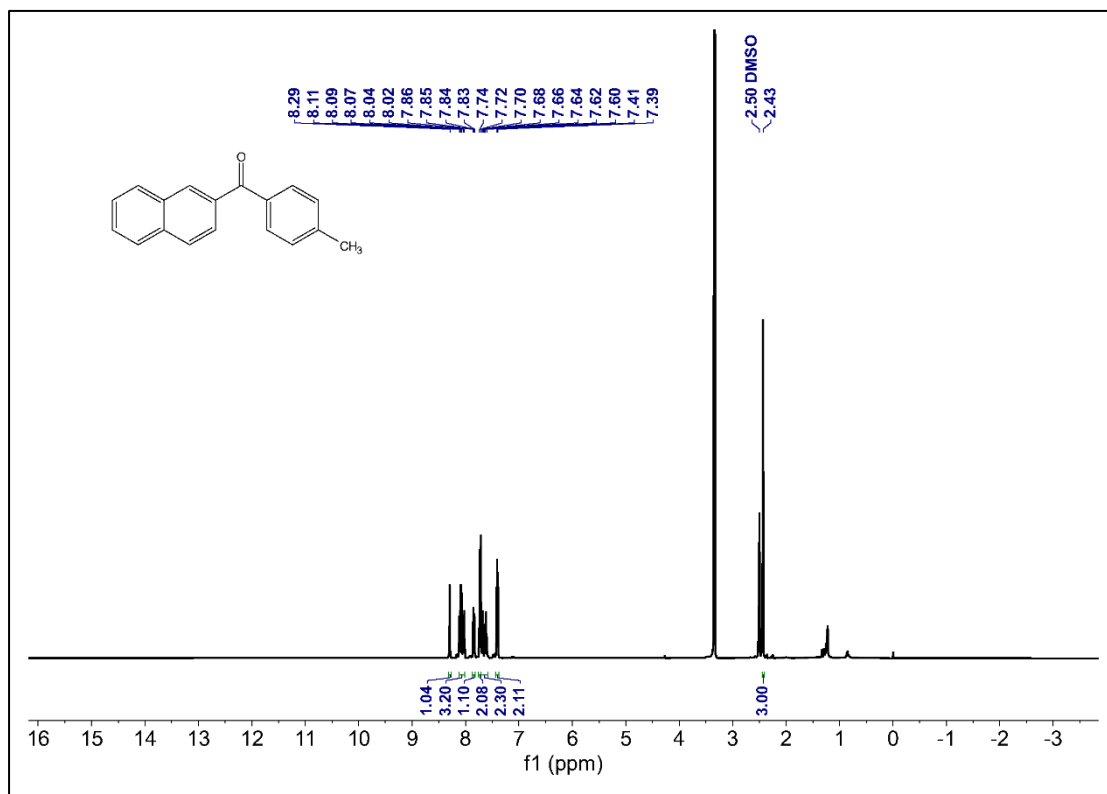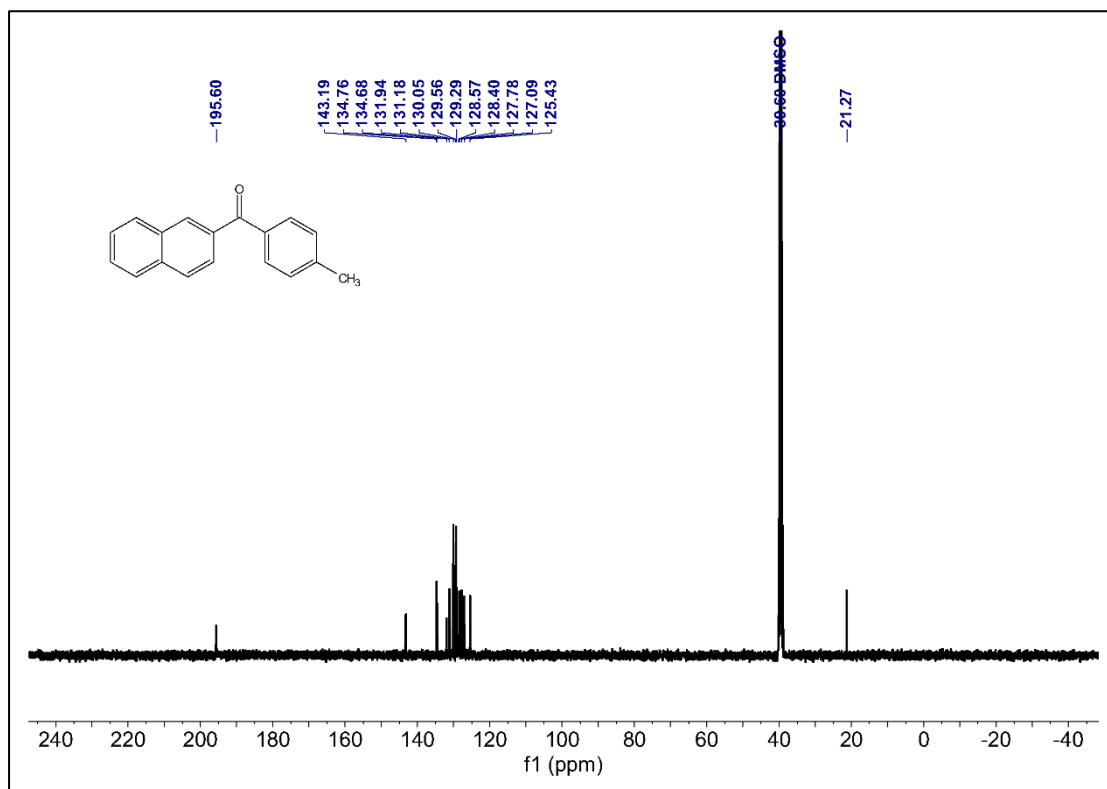

## 3ai

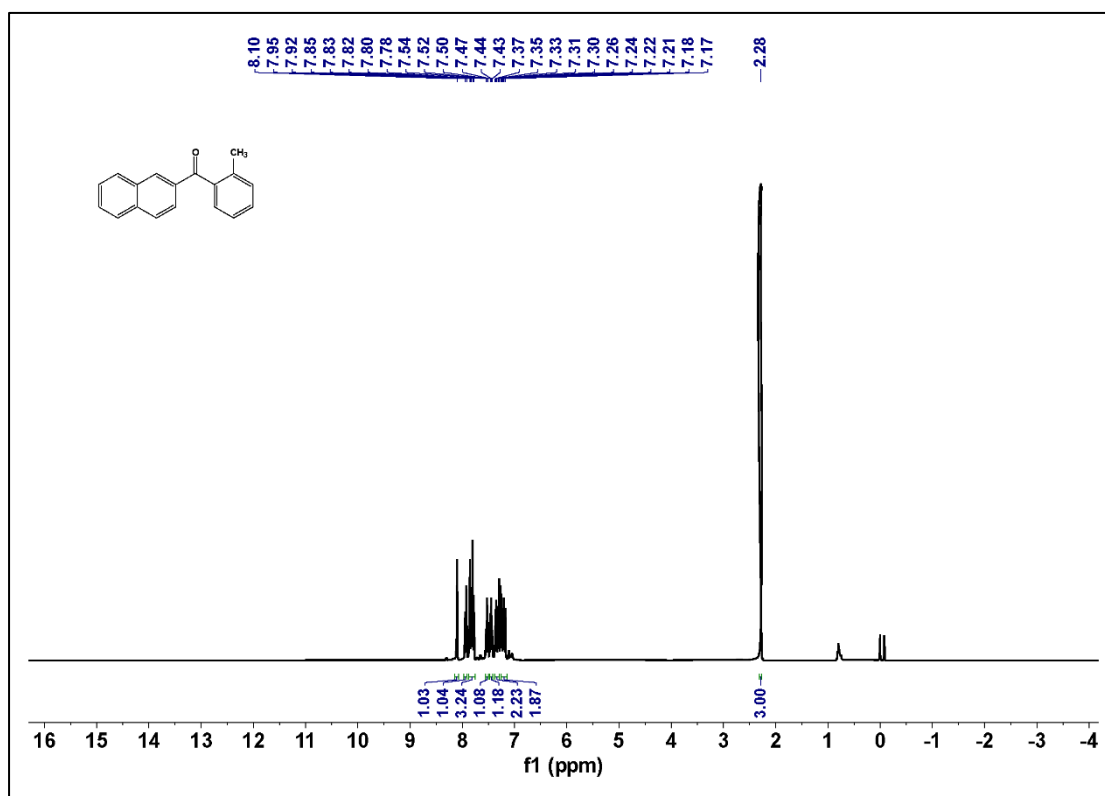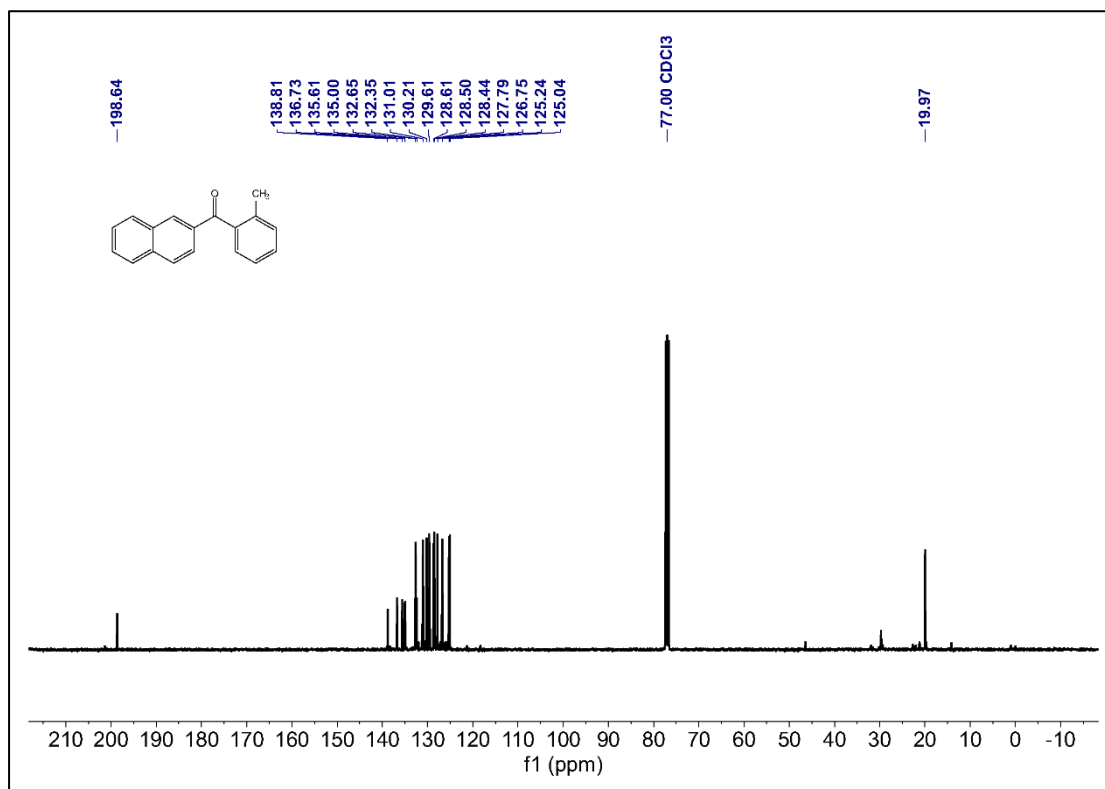



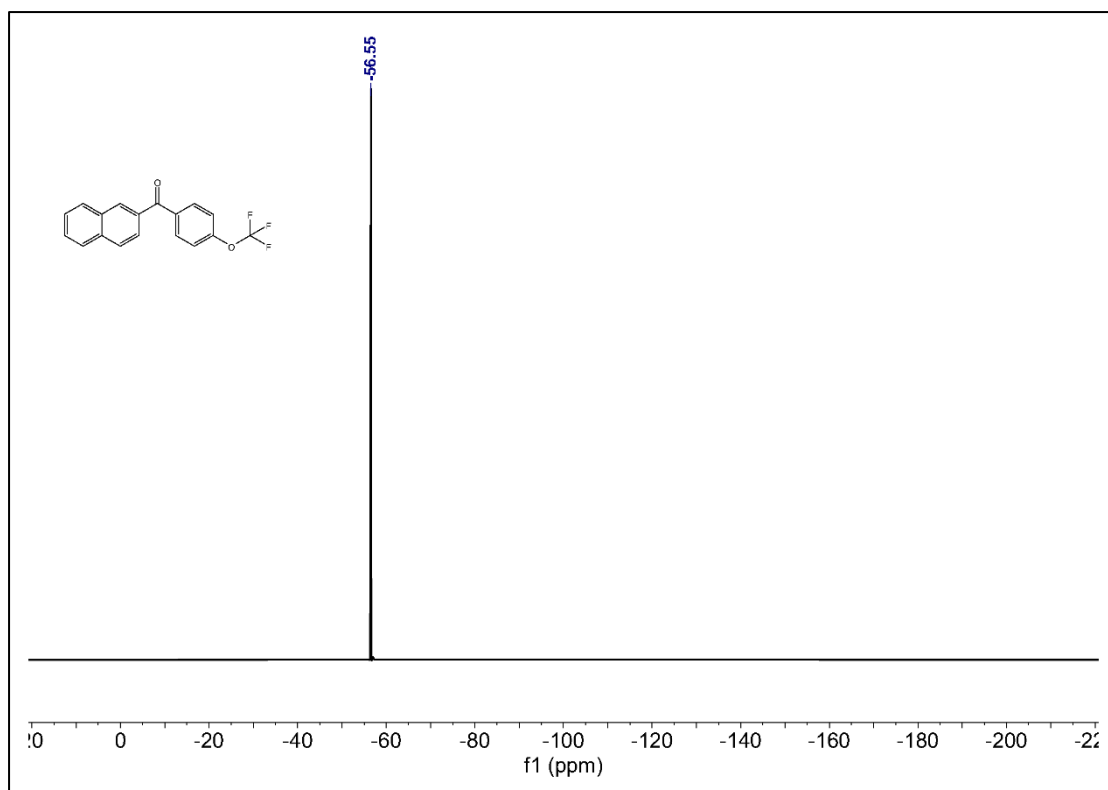

3ak

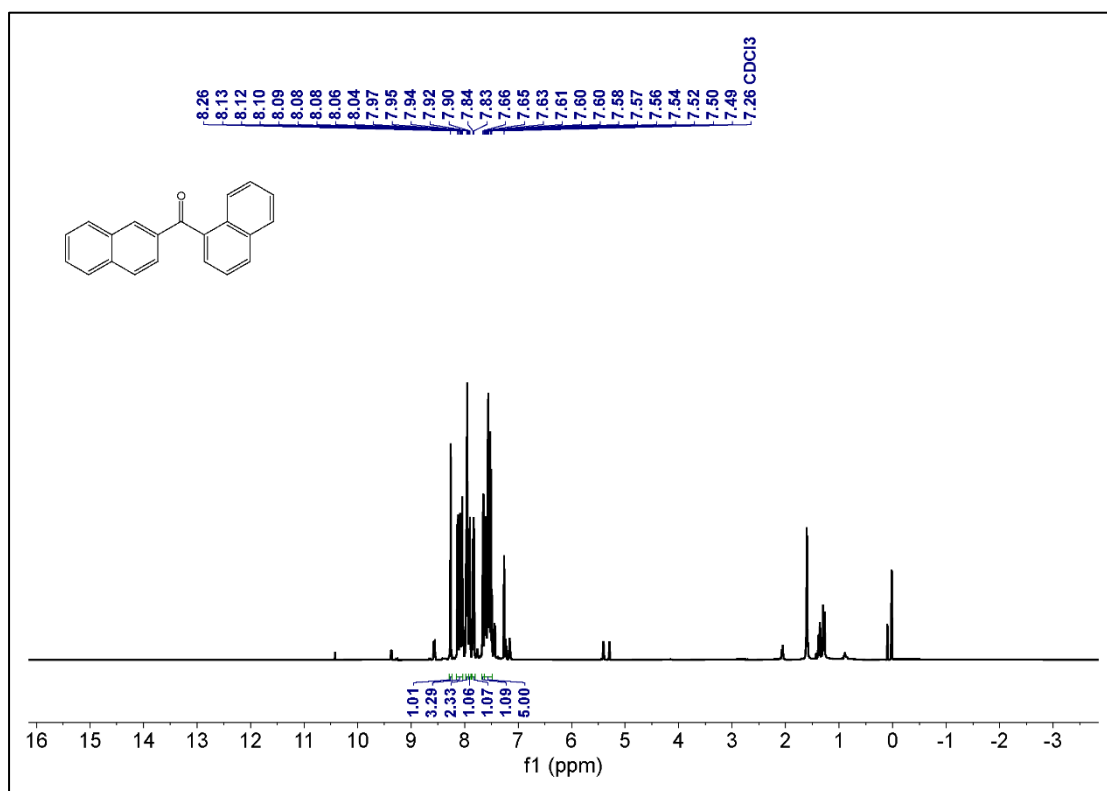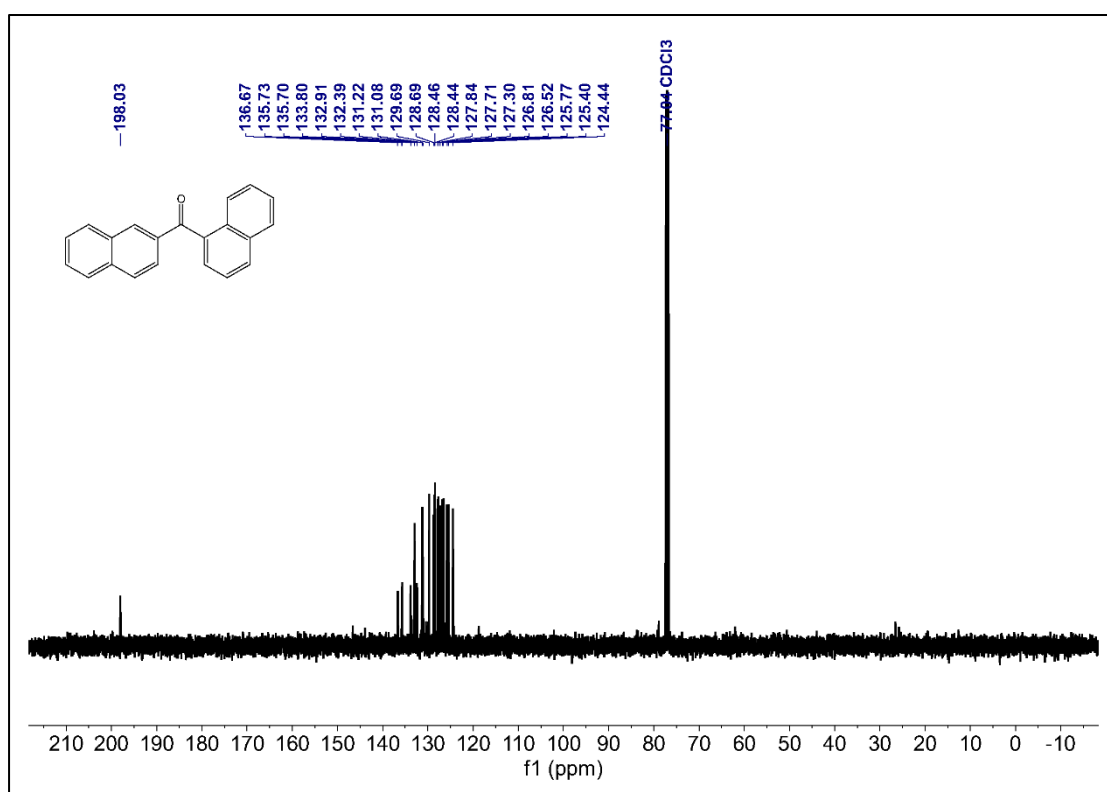

3a1

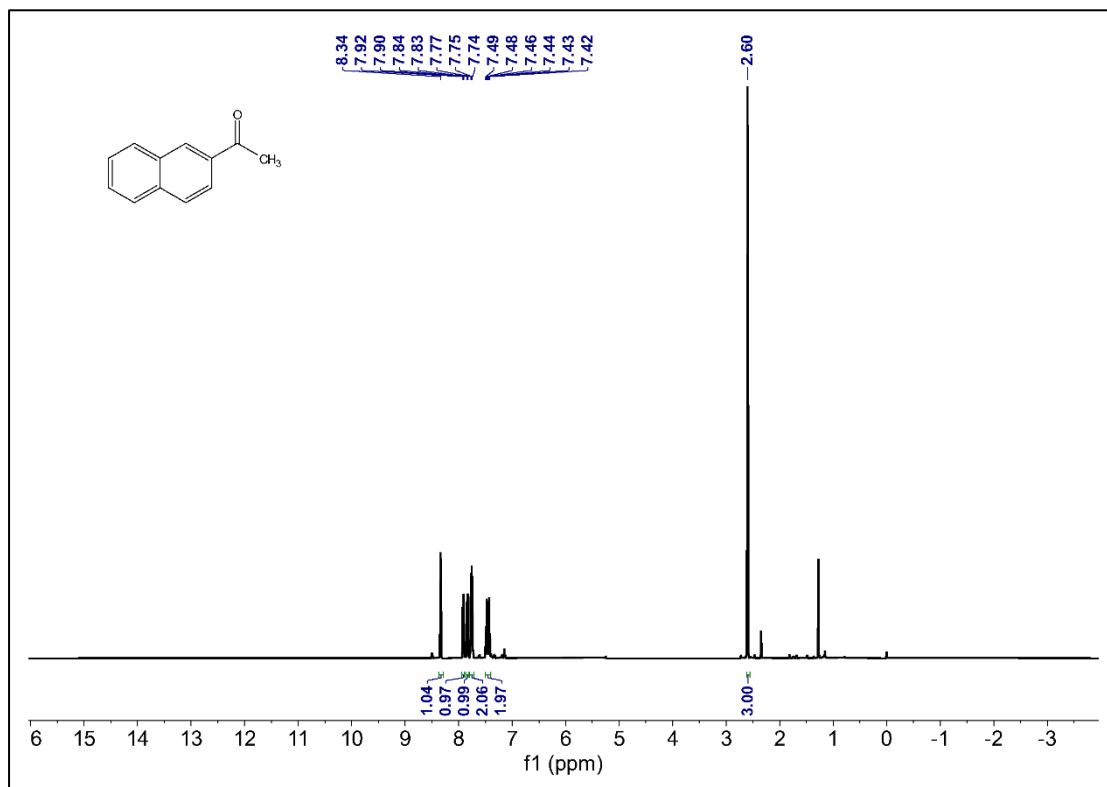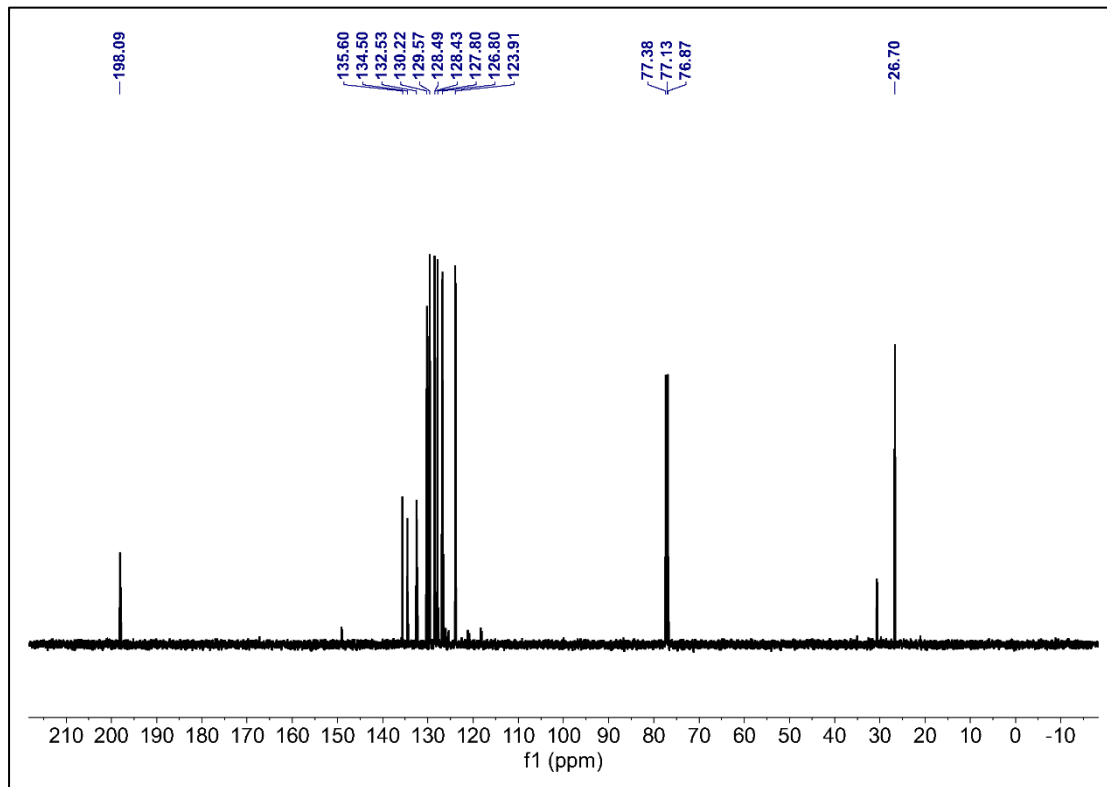

3am

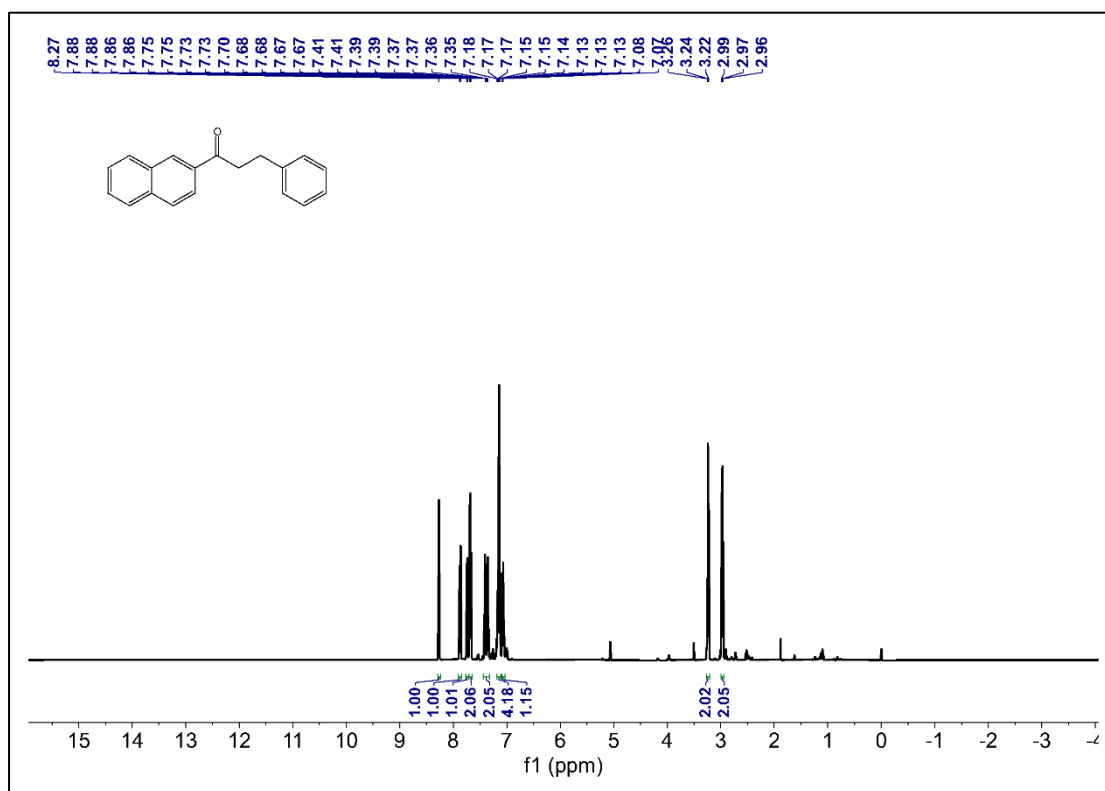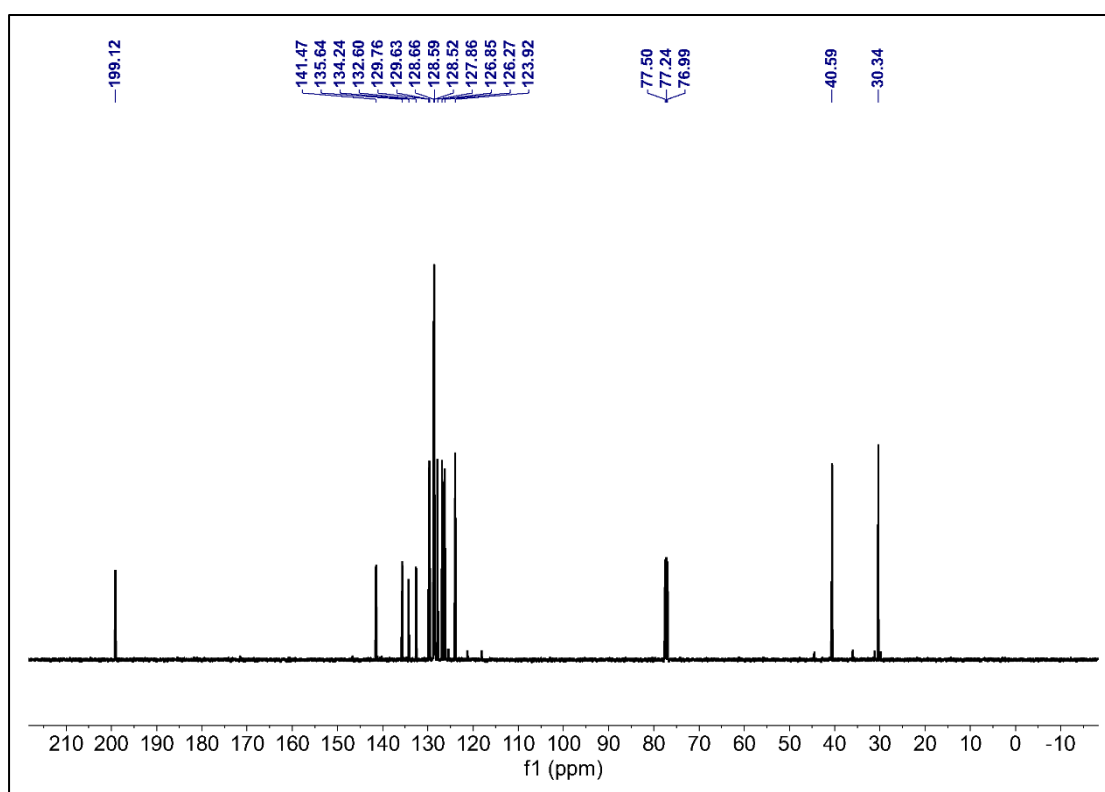



3an

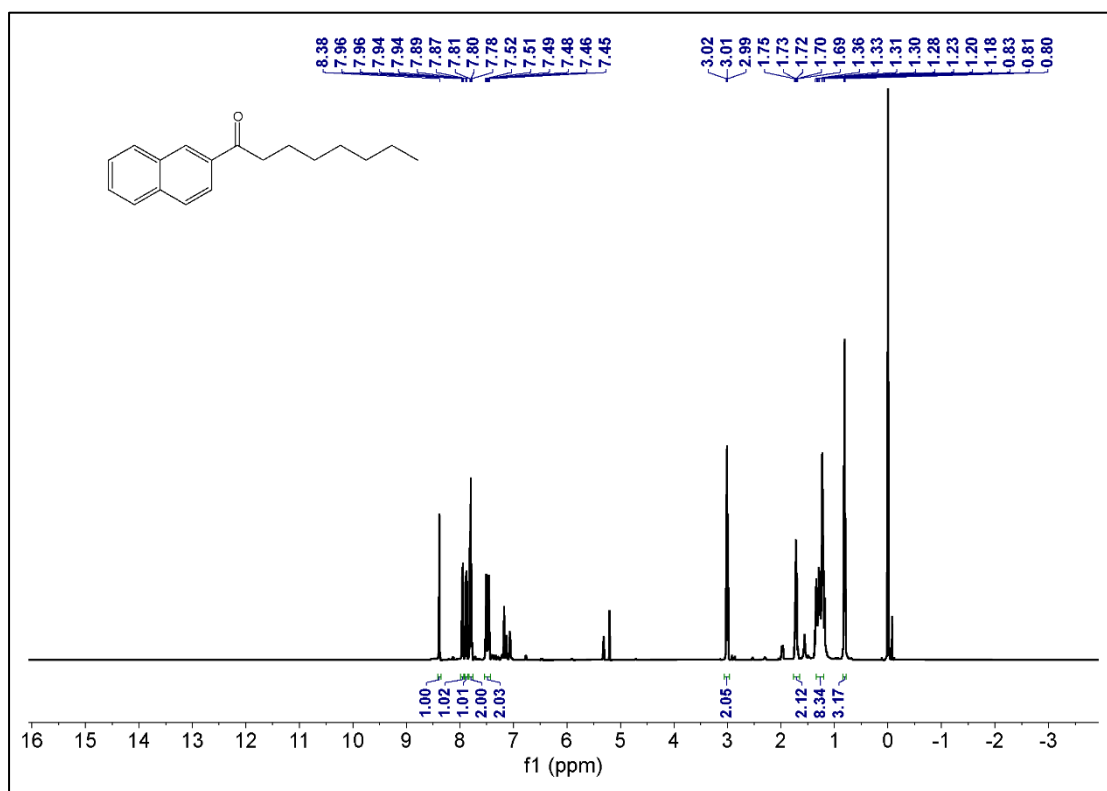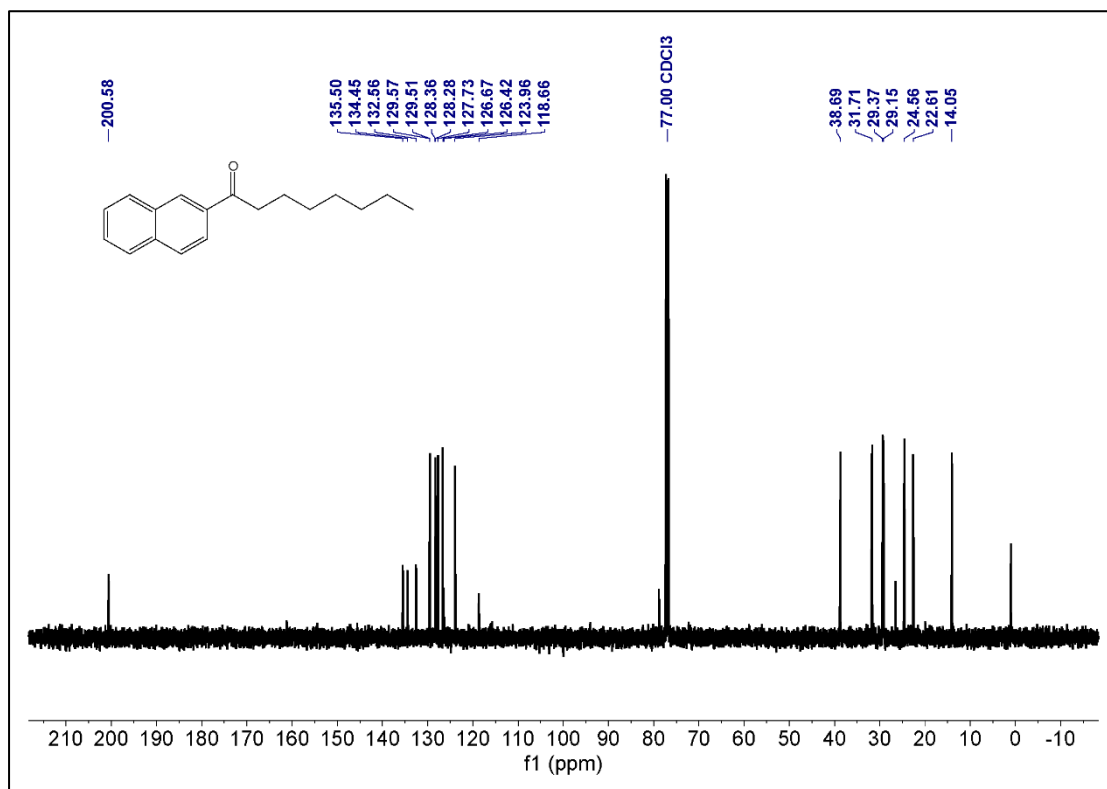

3ao

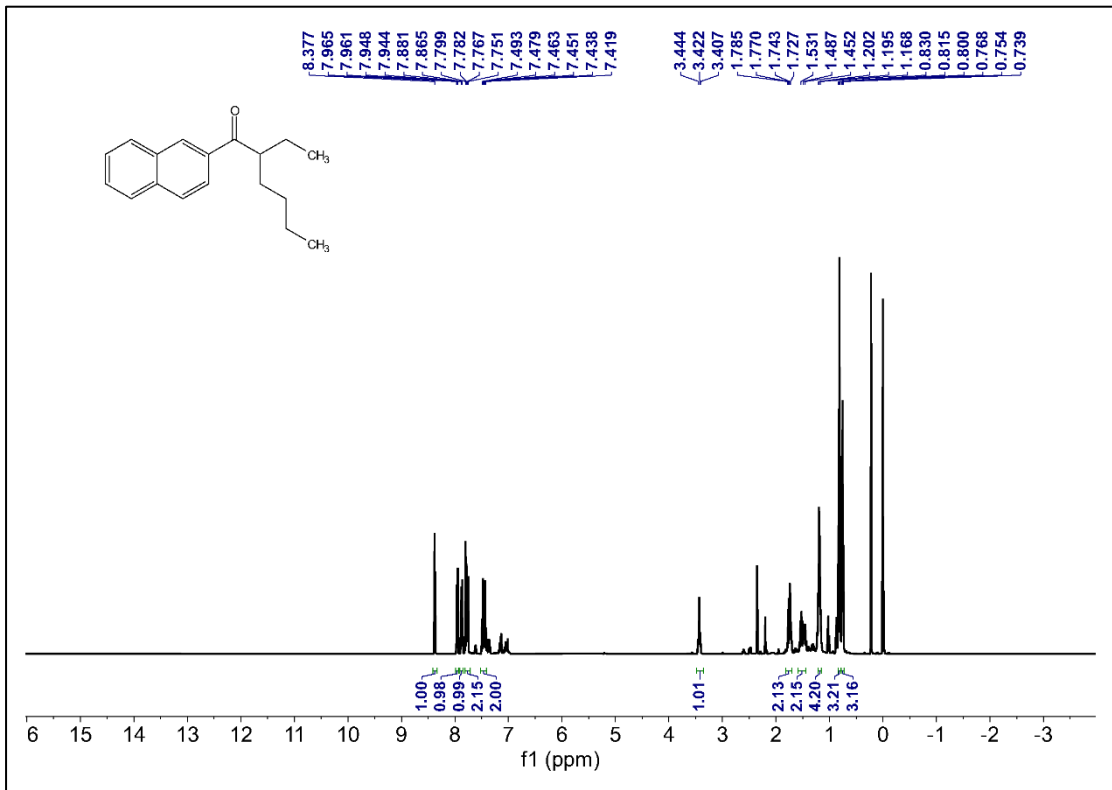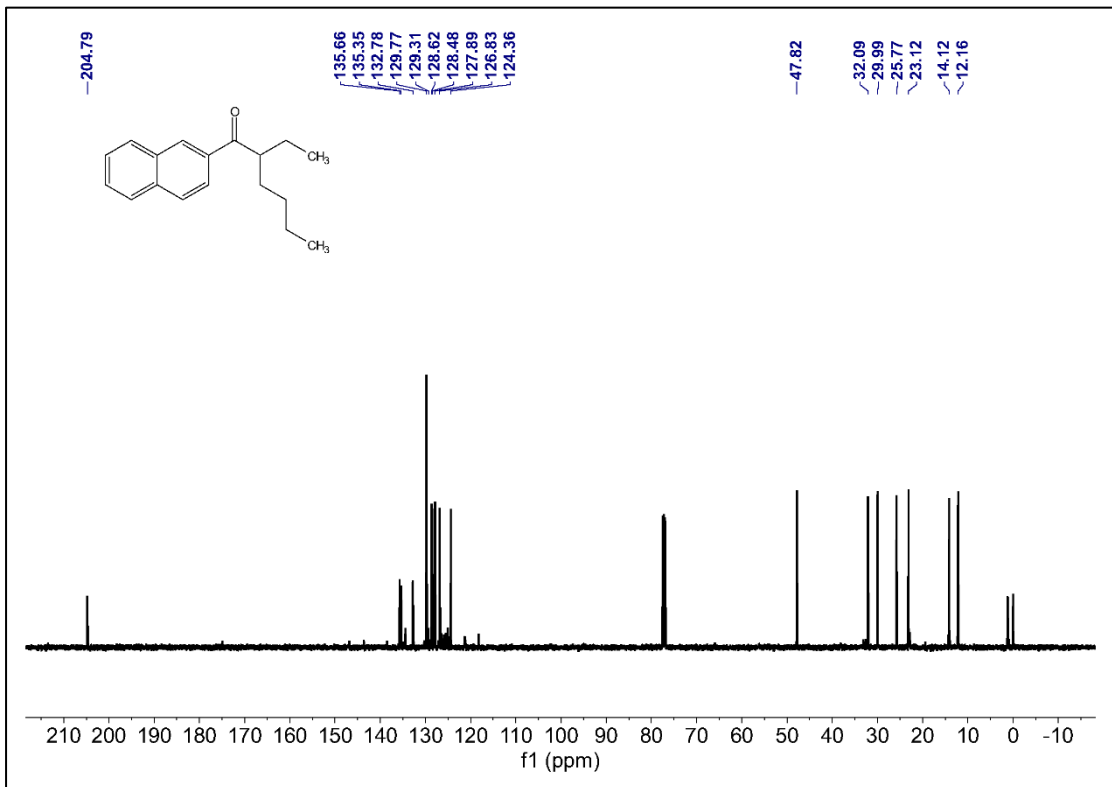

3ap

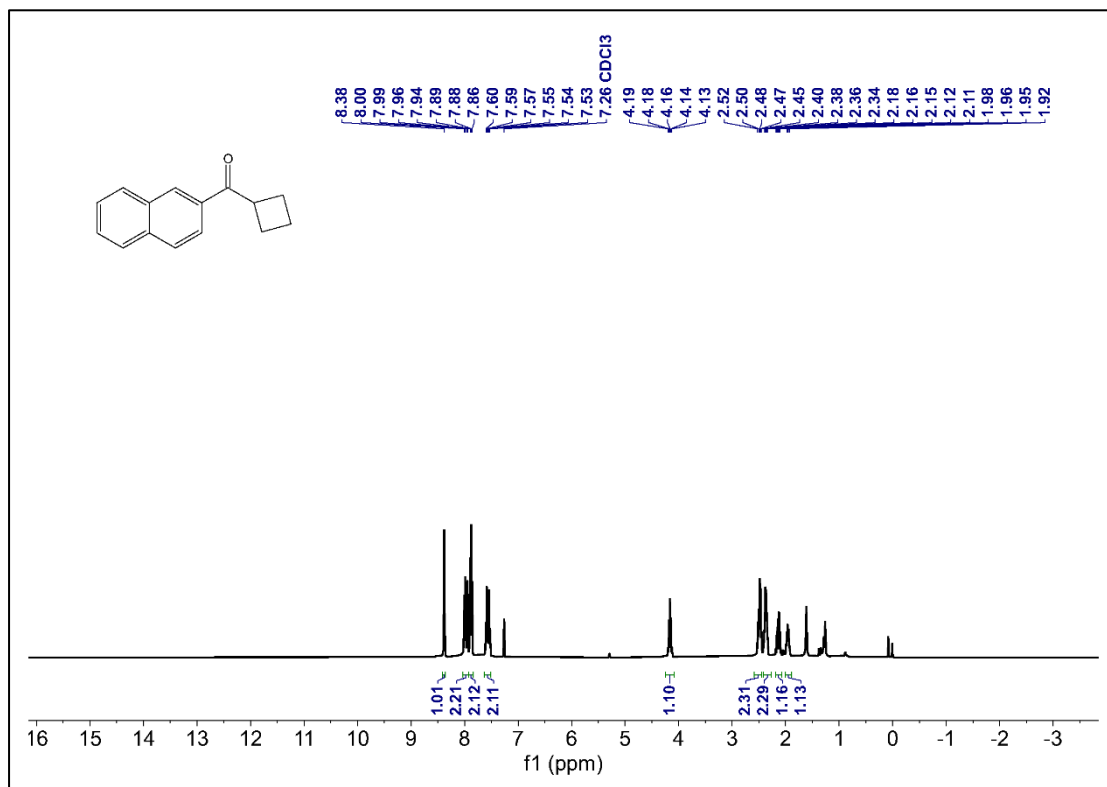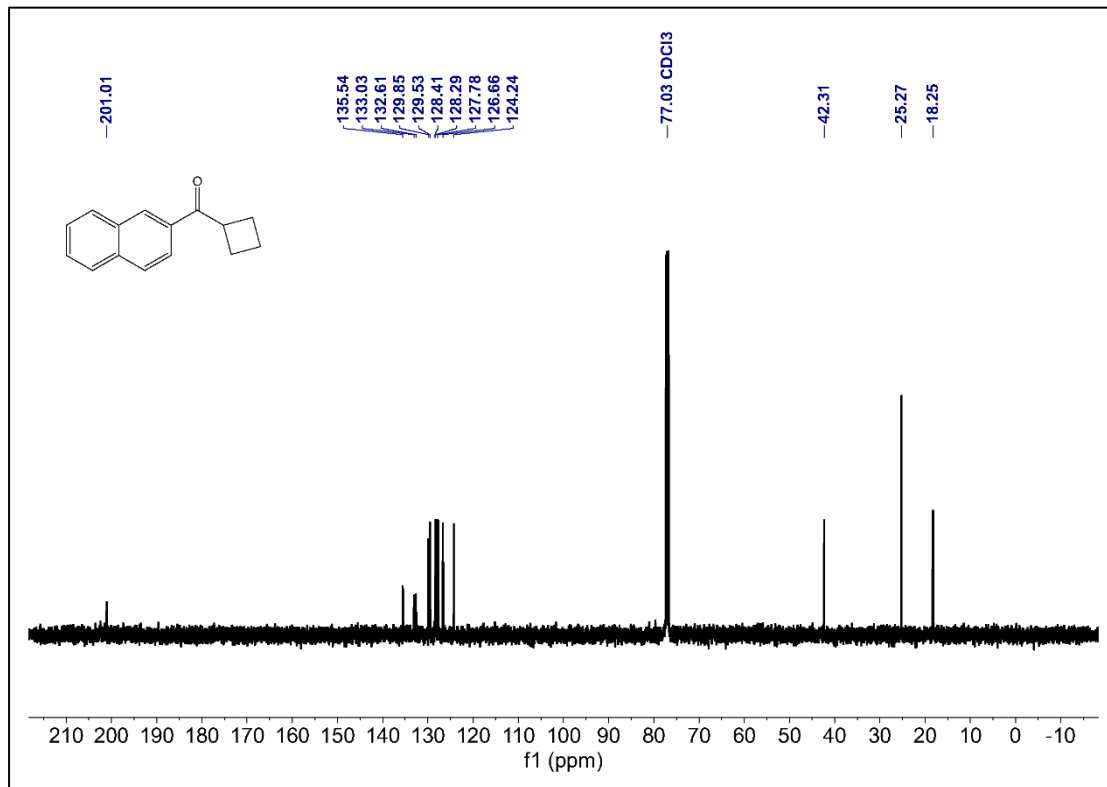



3ar

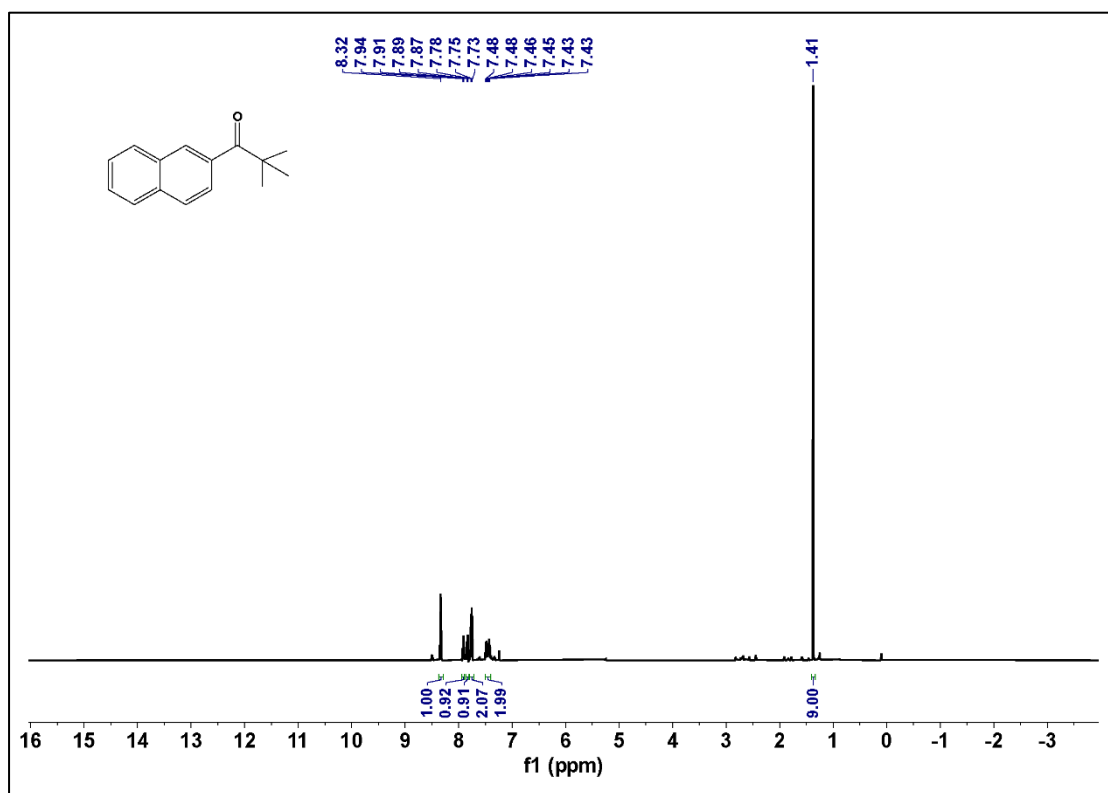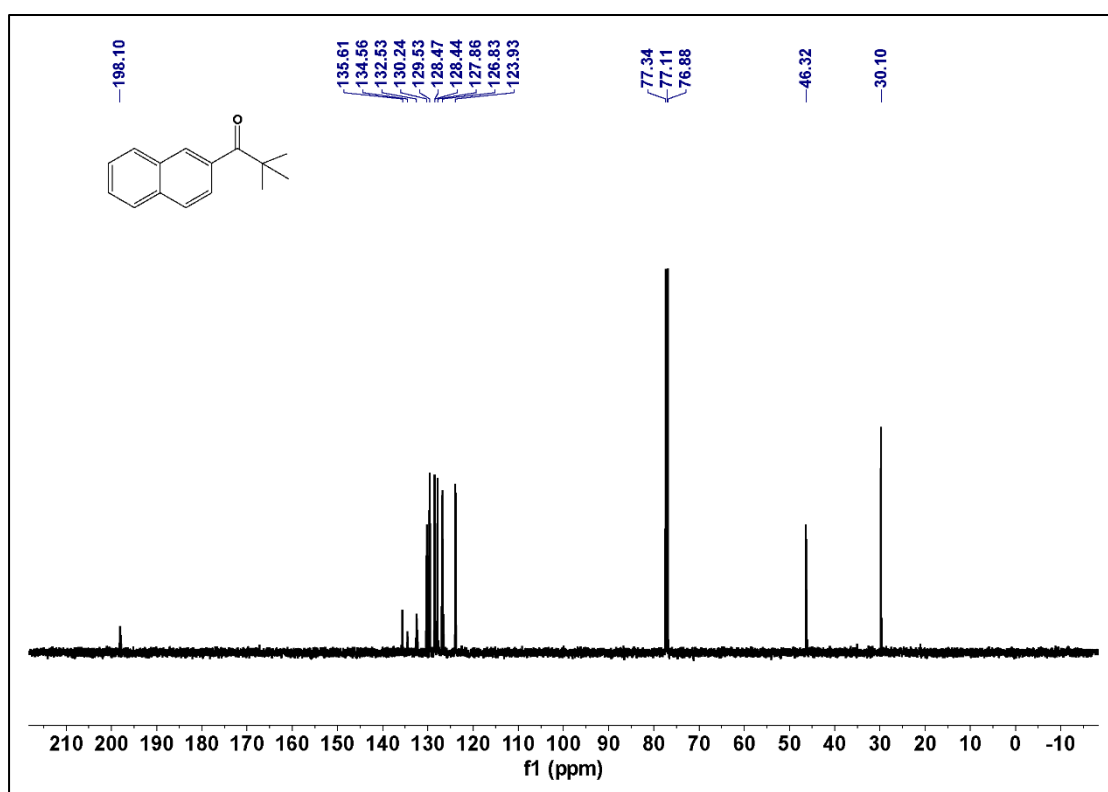

3ba

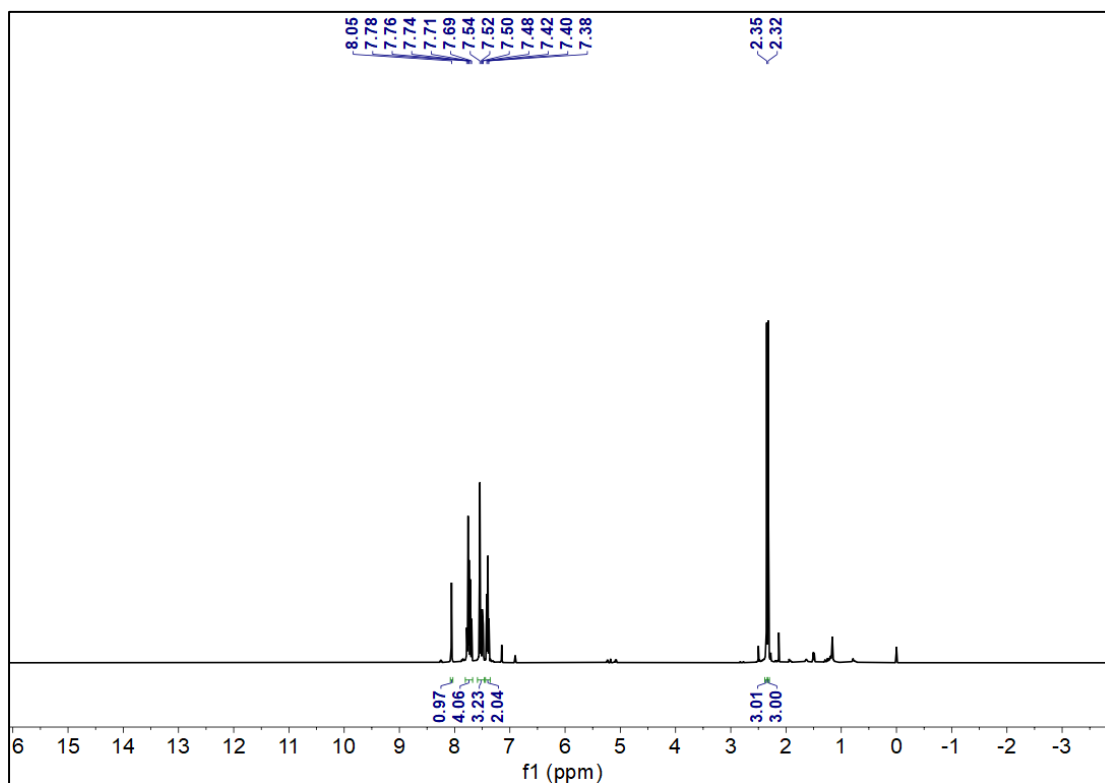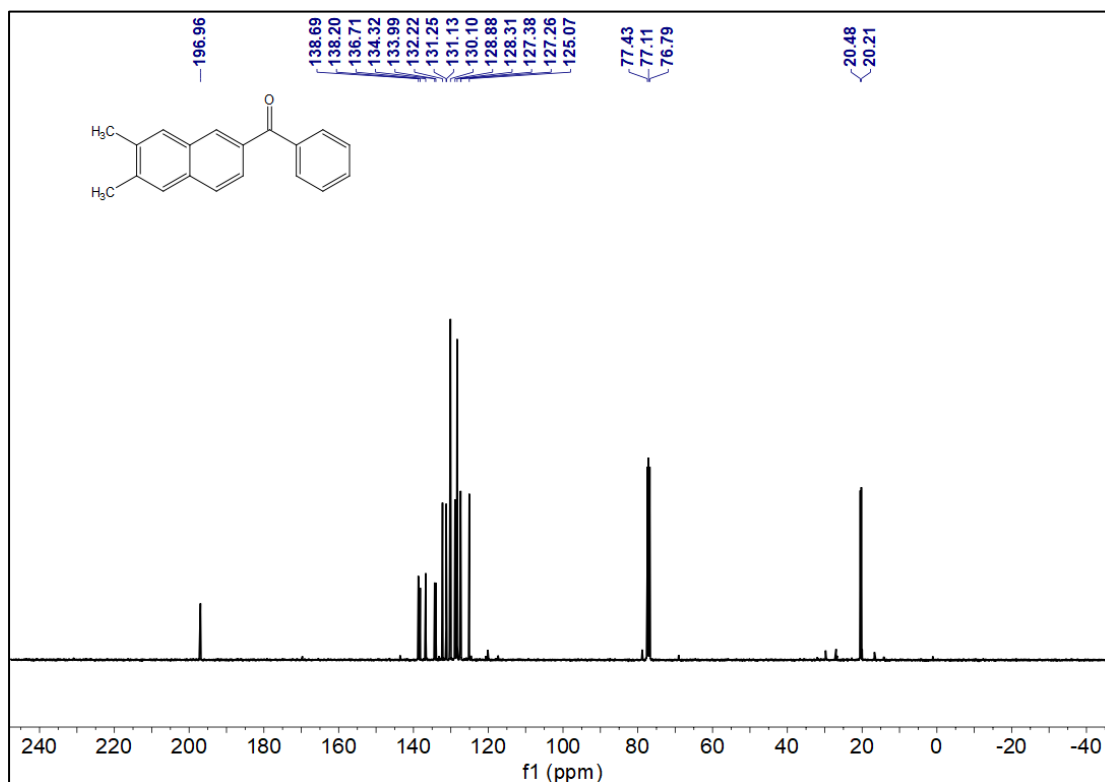

3ca

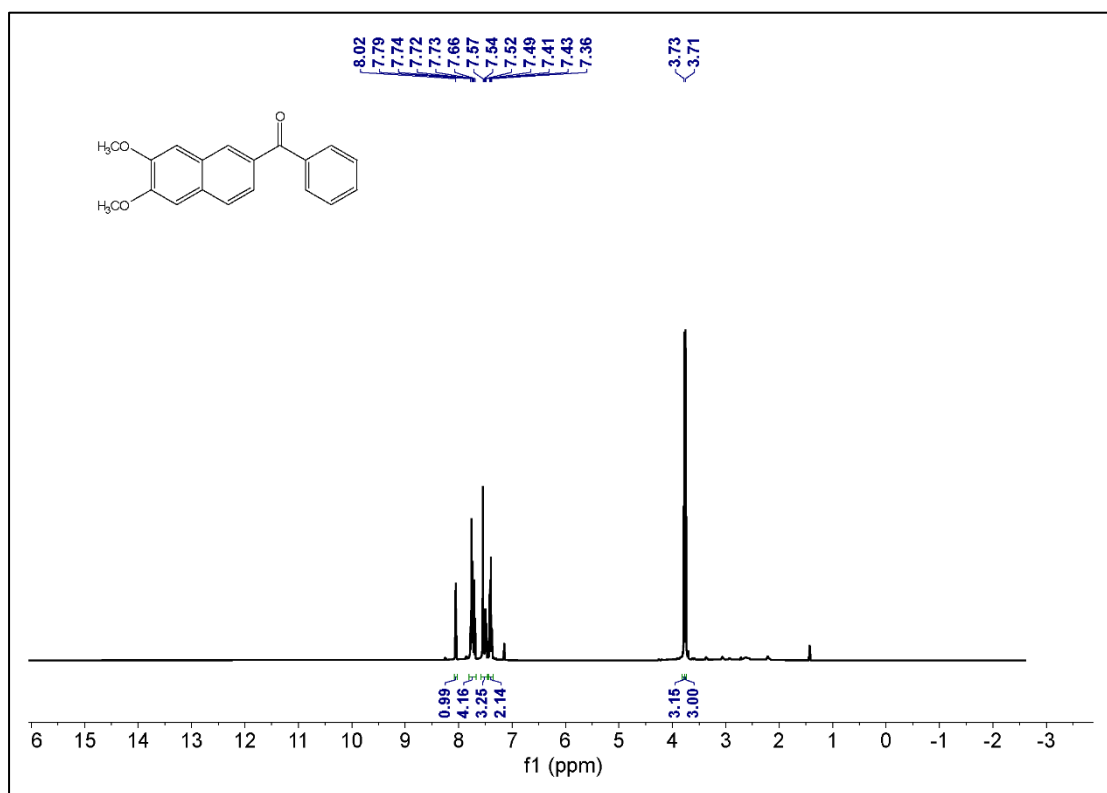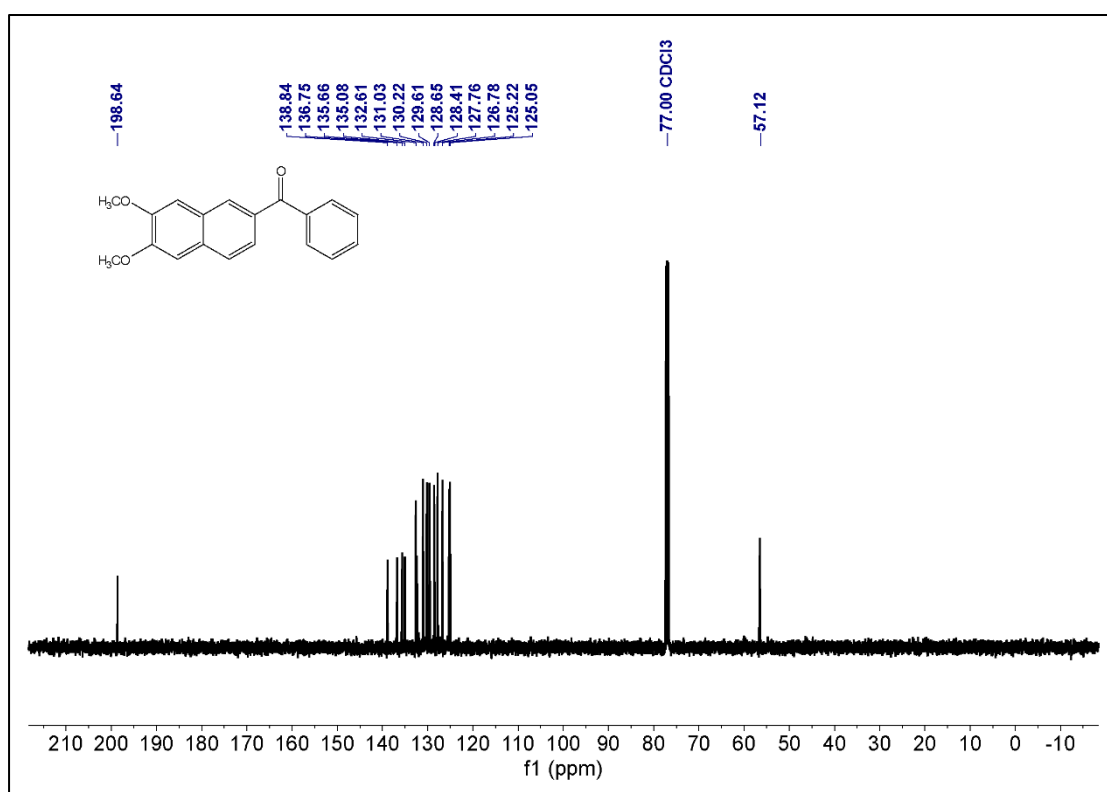

3da

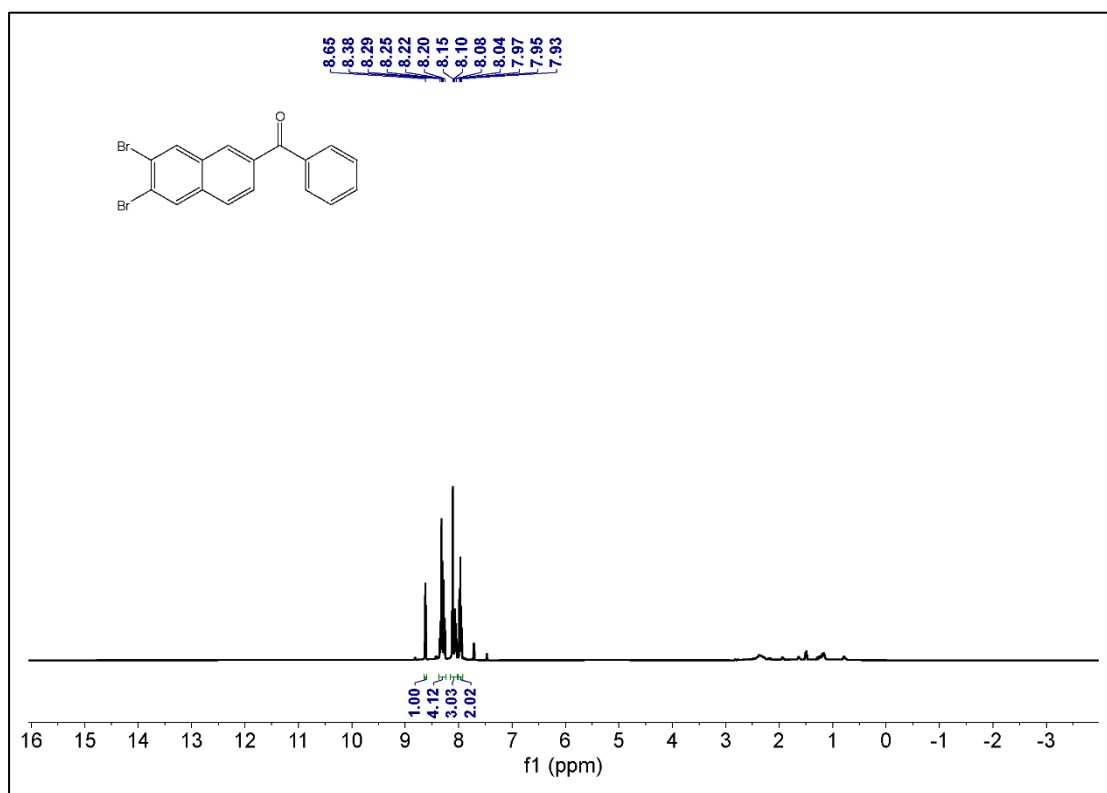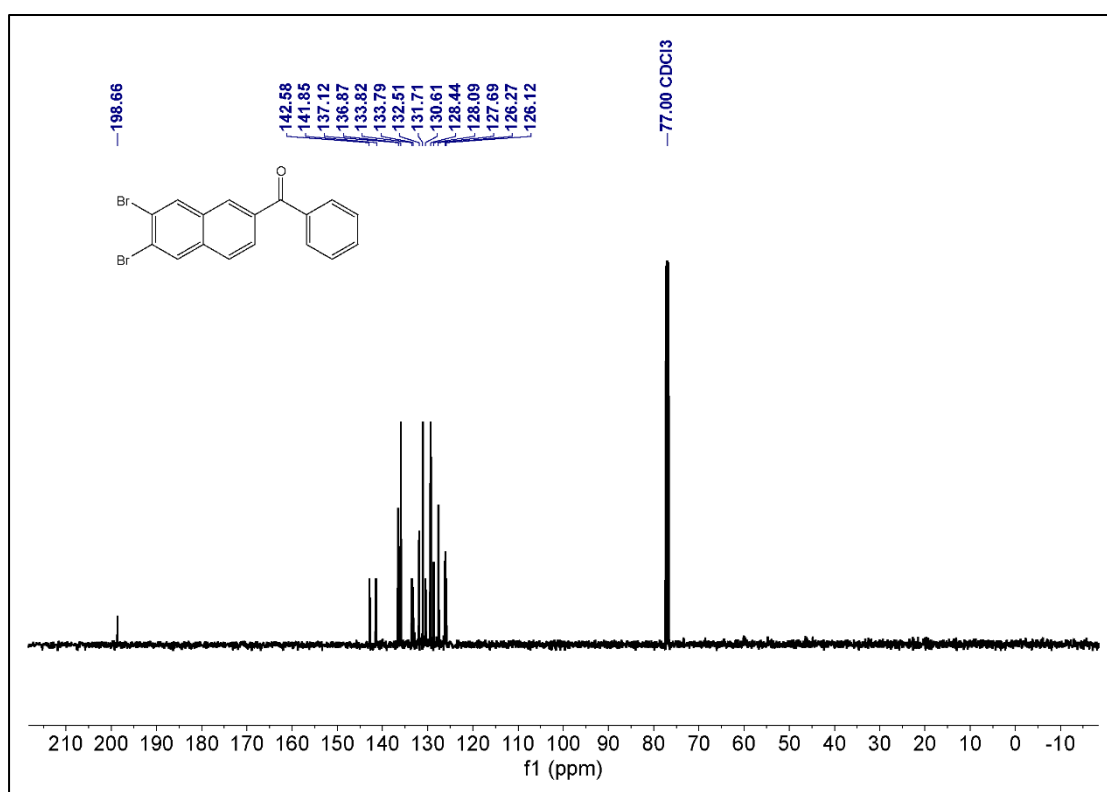



3ea

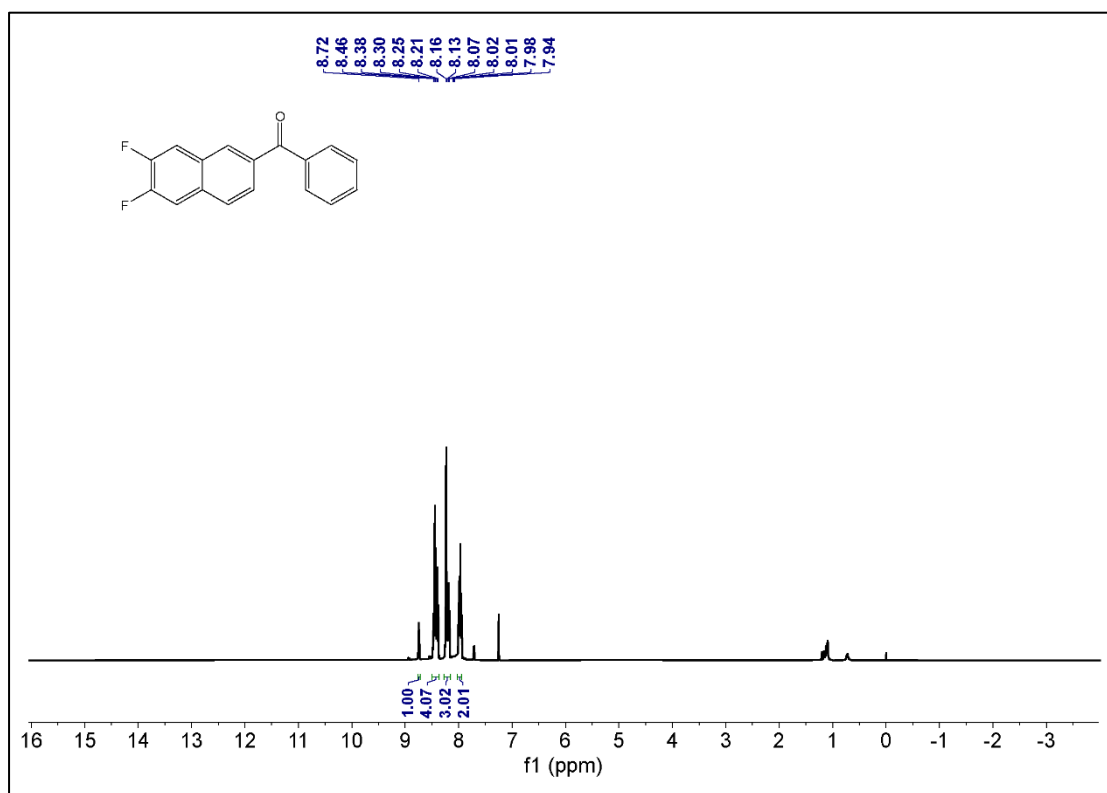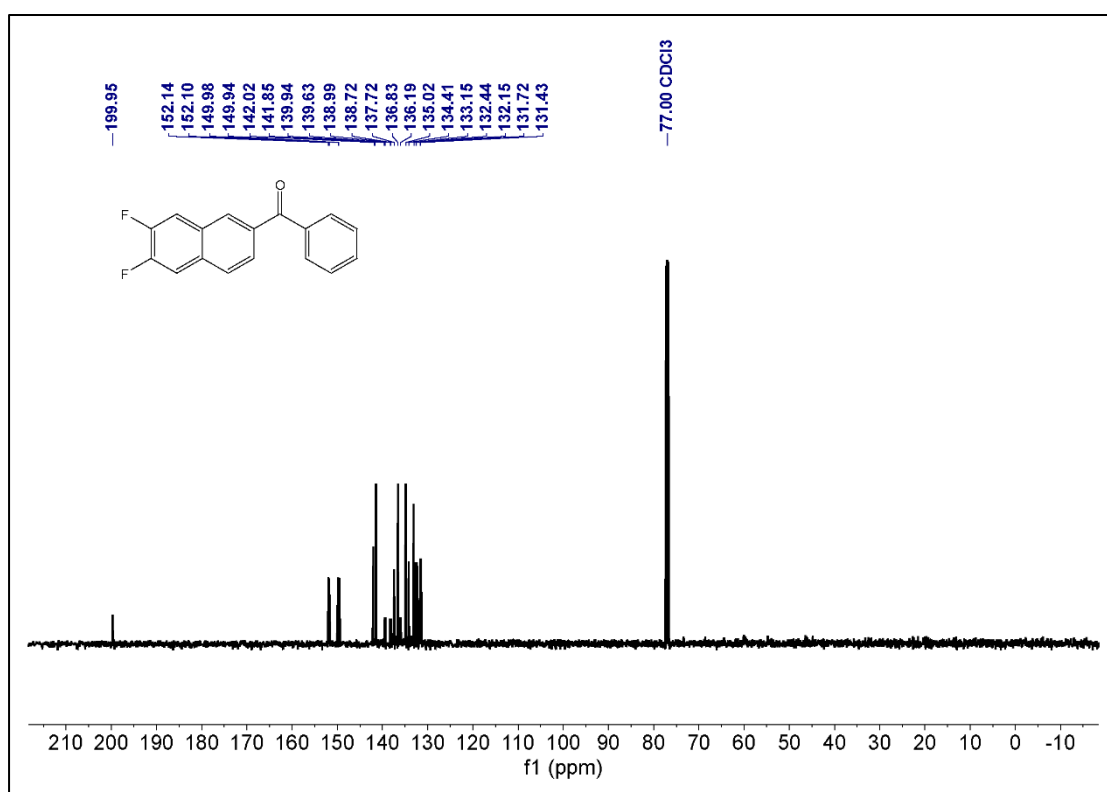

3cr

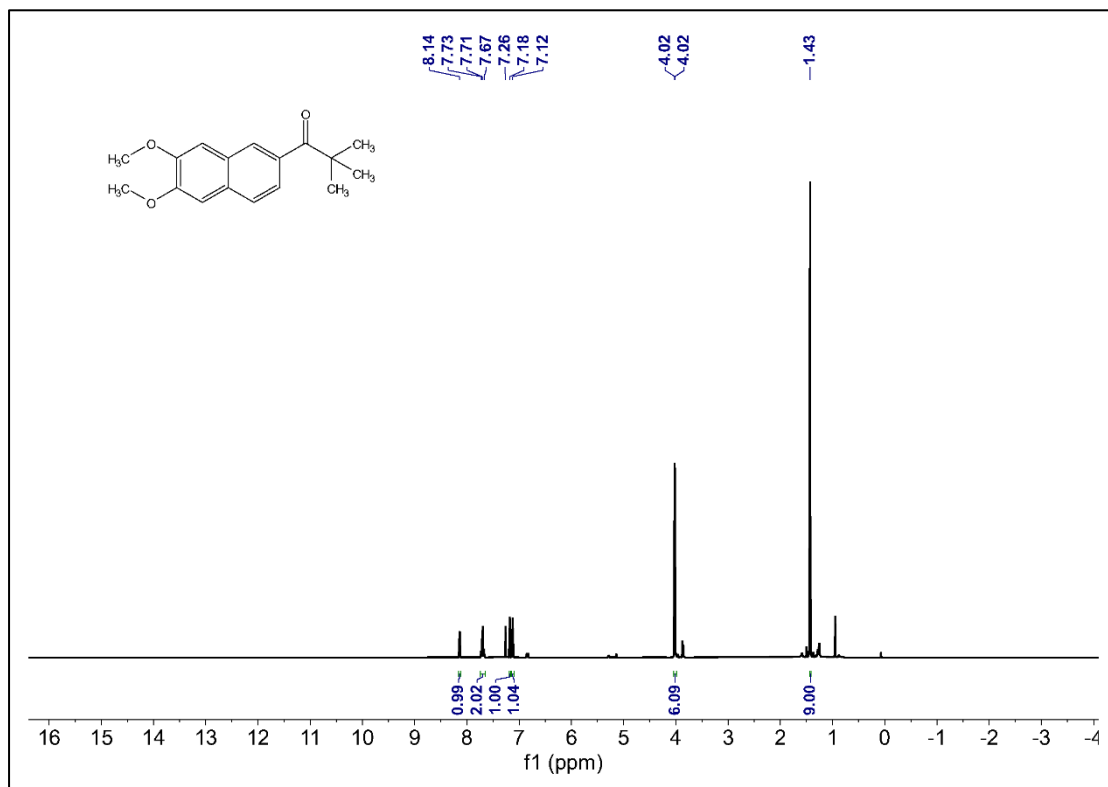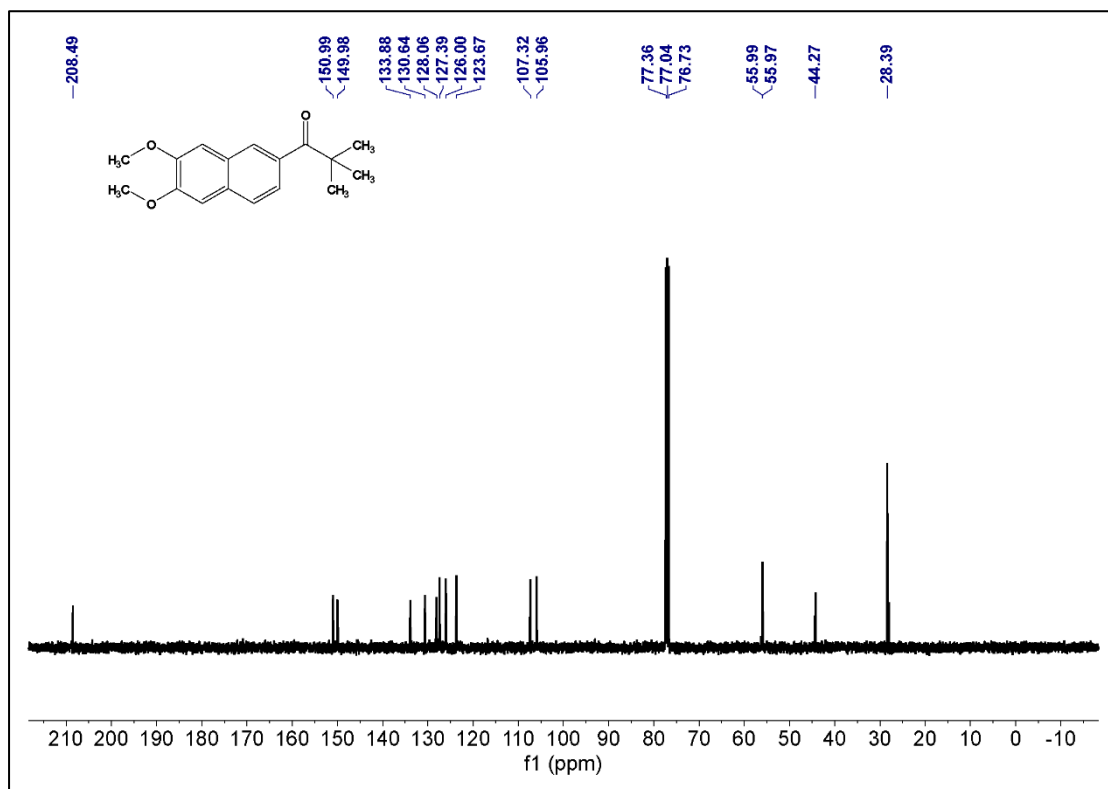

3fa

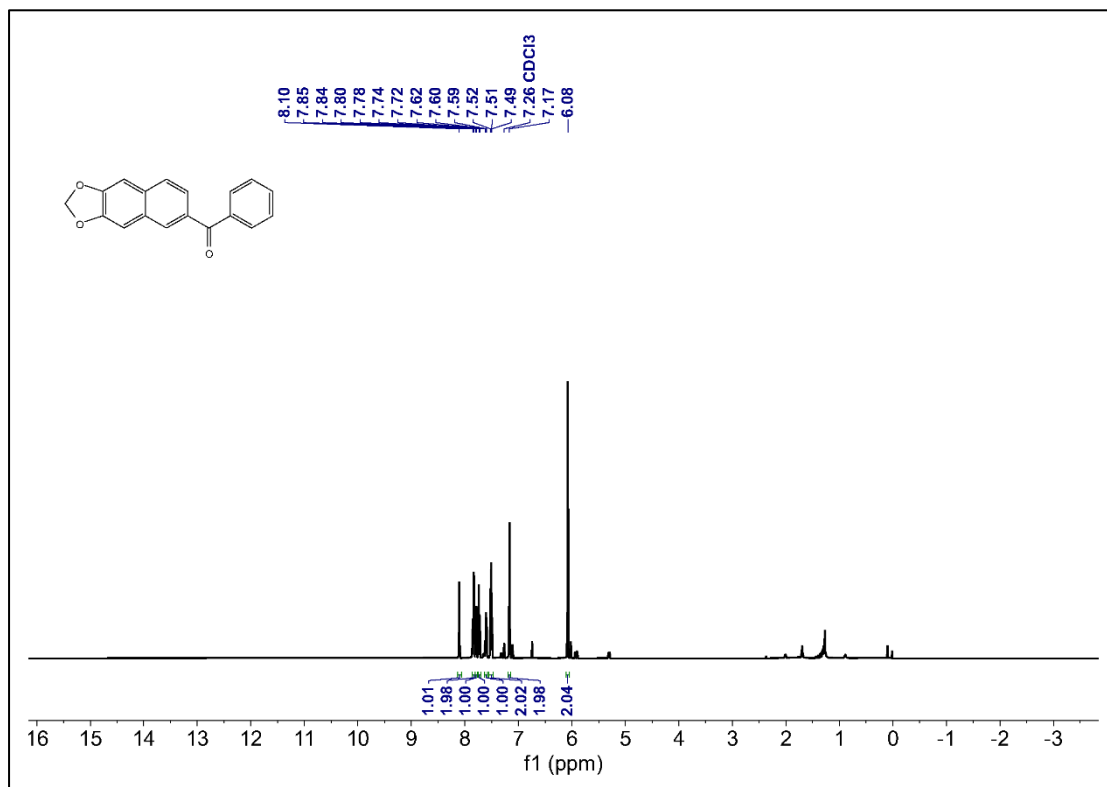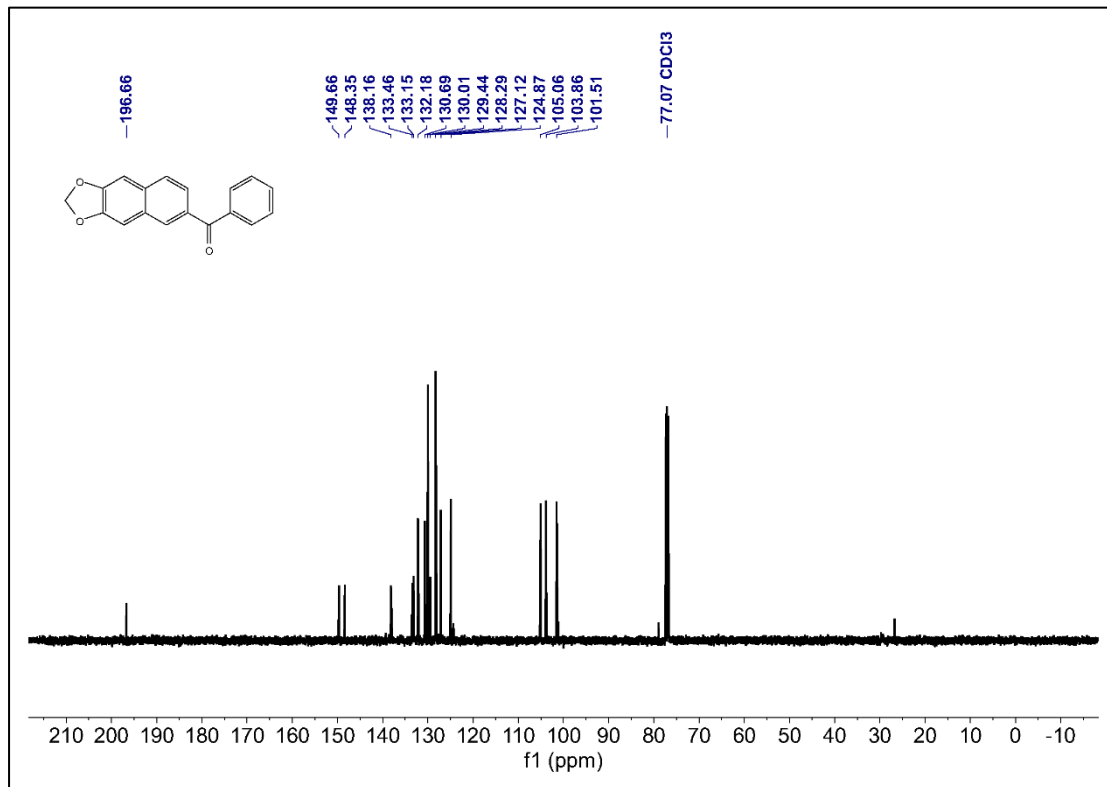

3fq

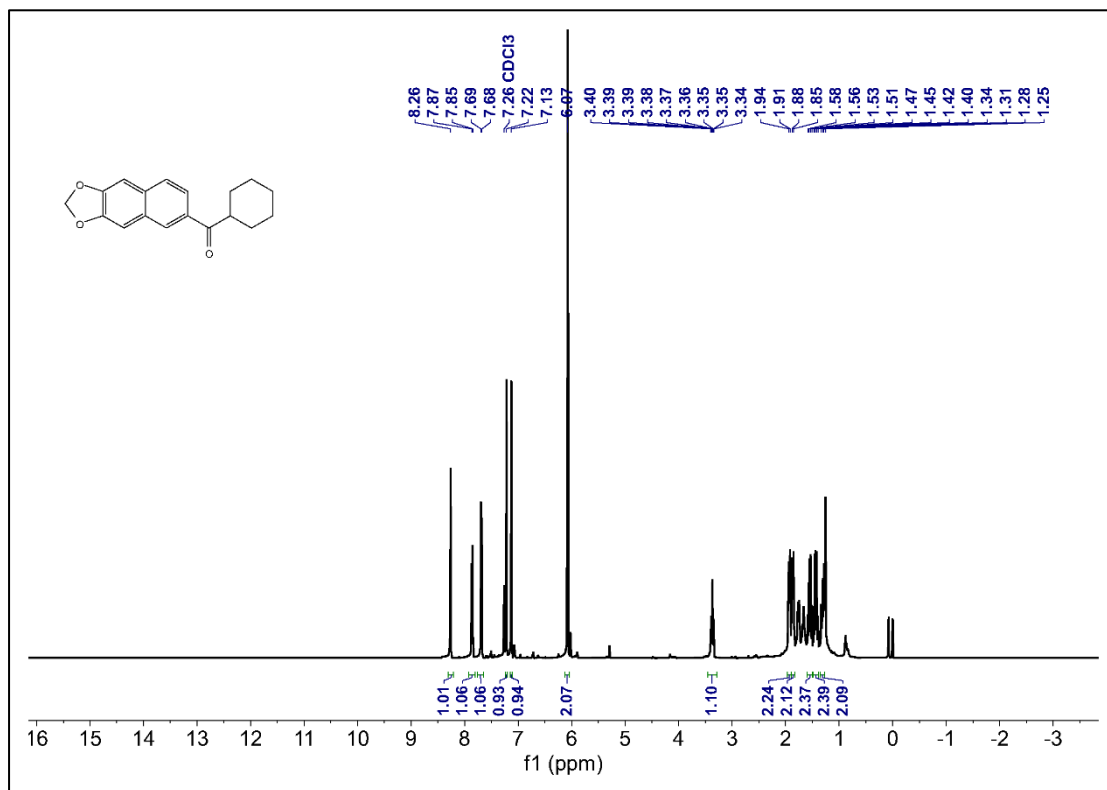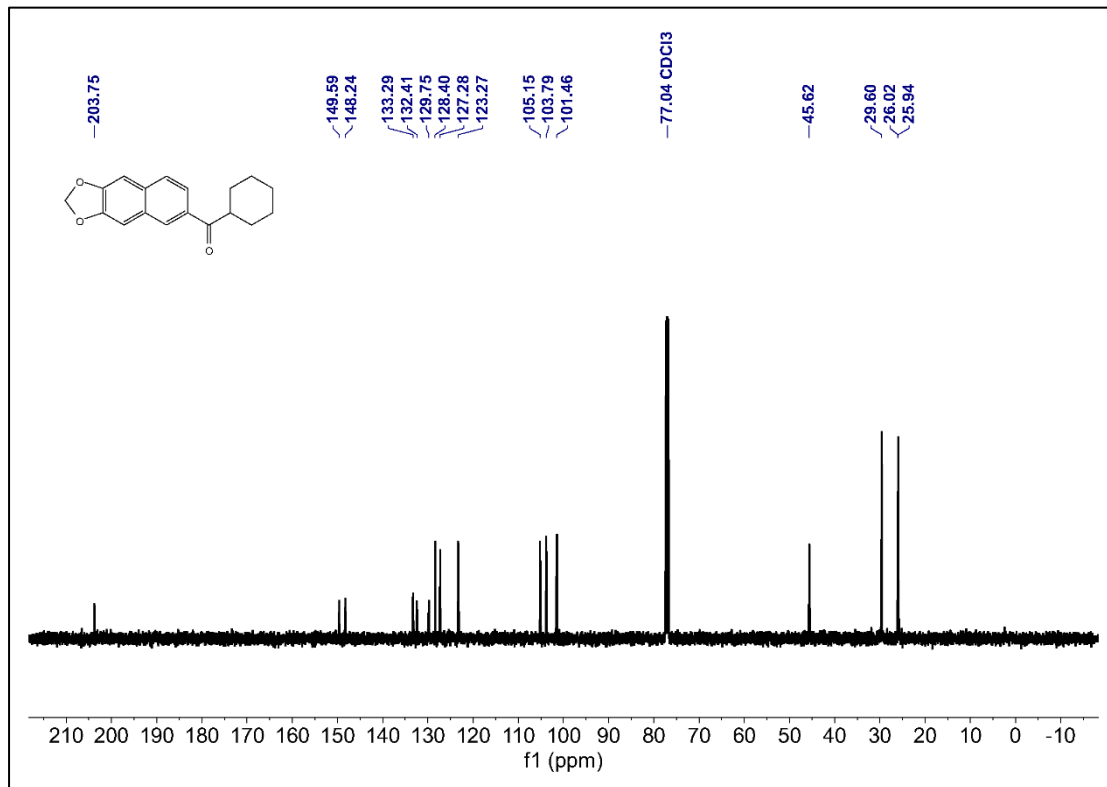

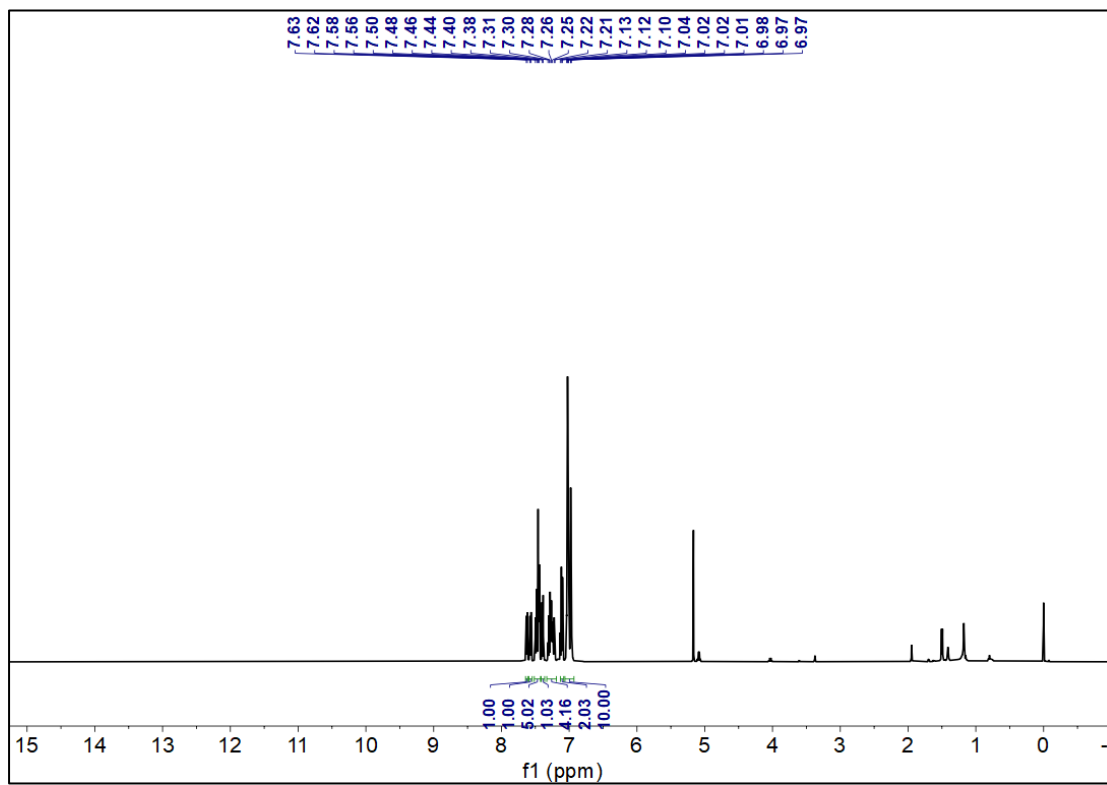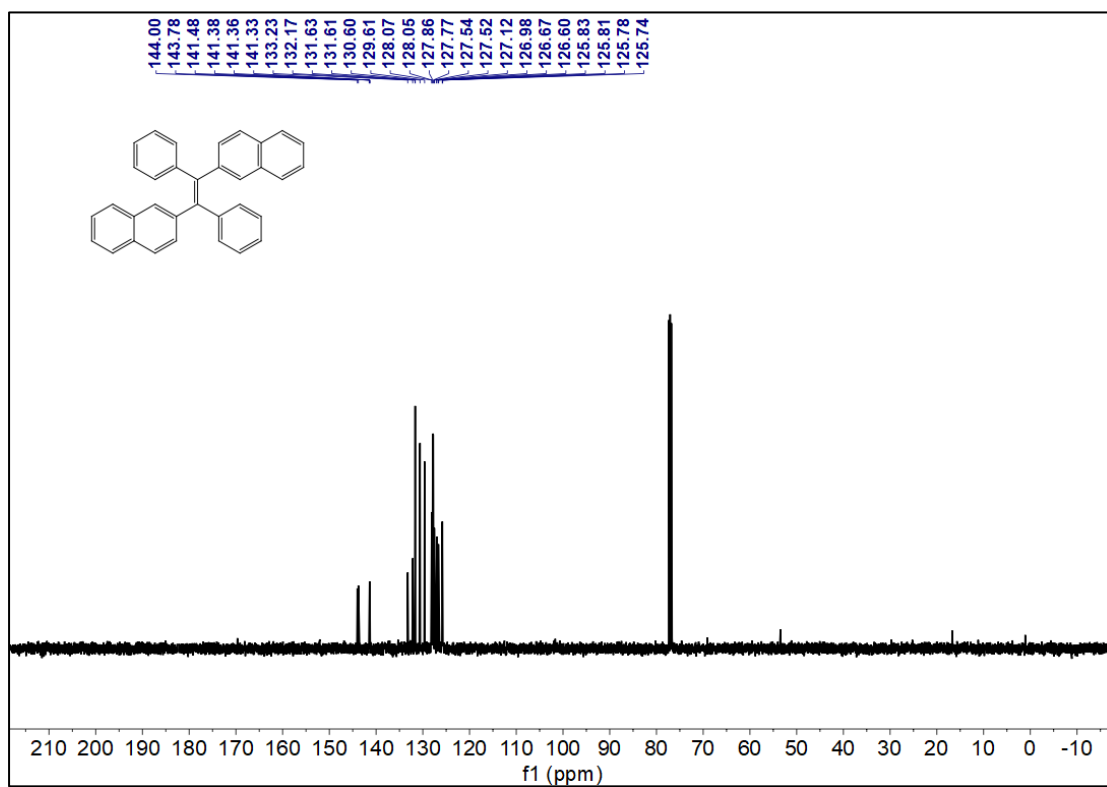

5

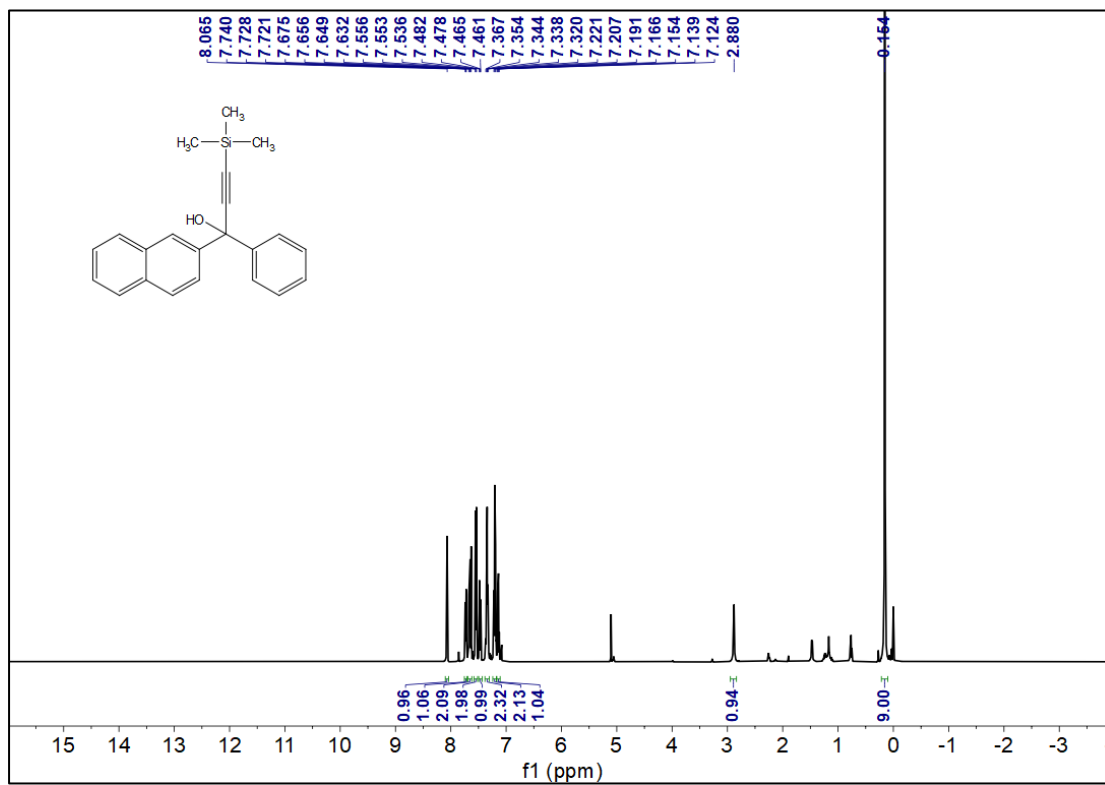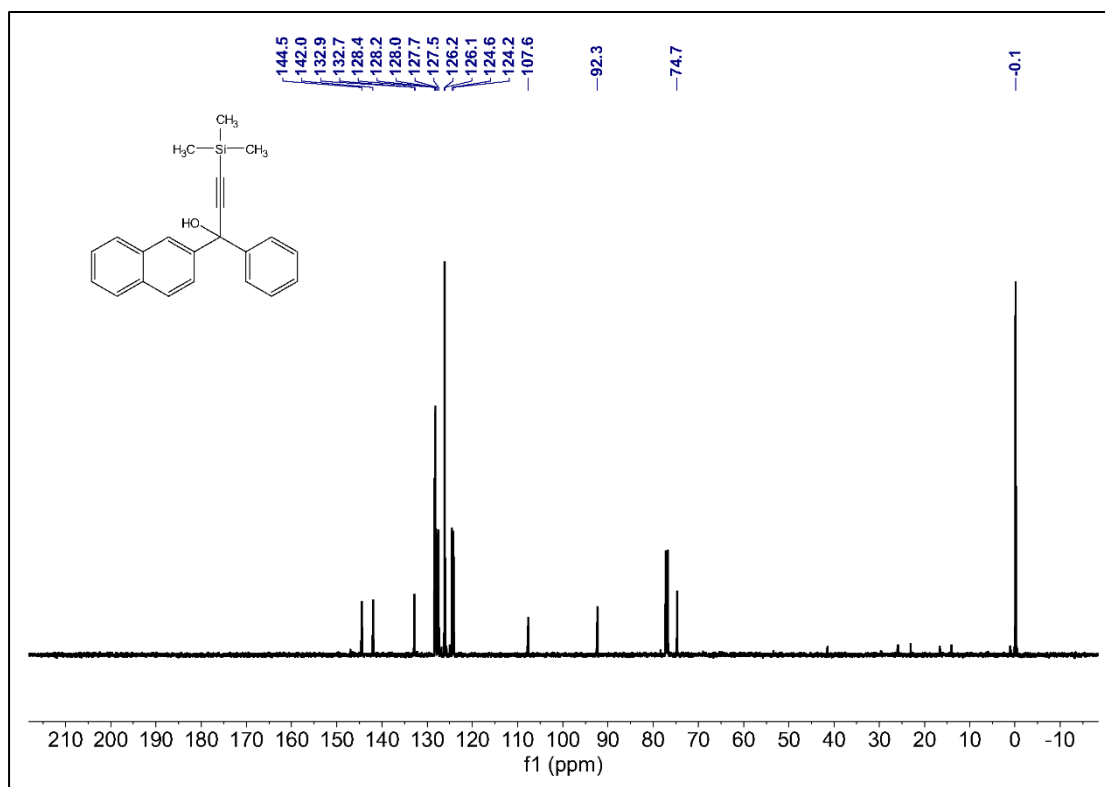

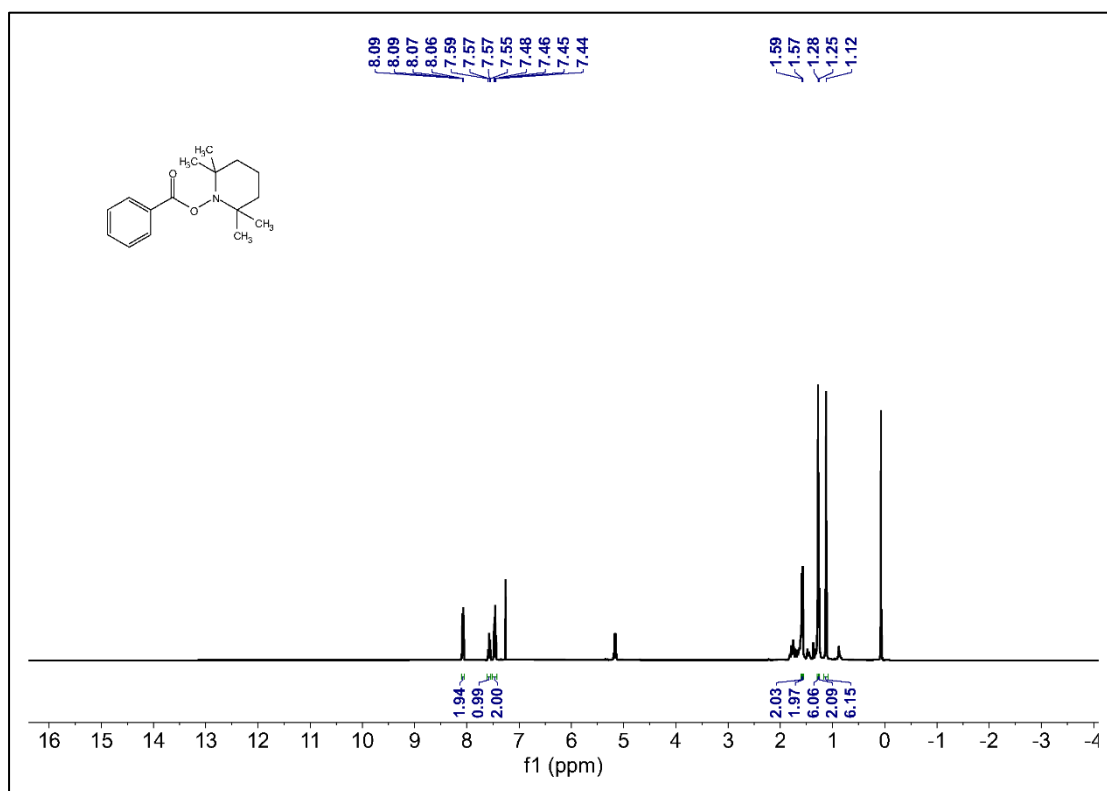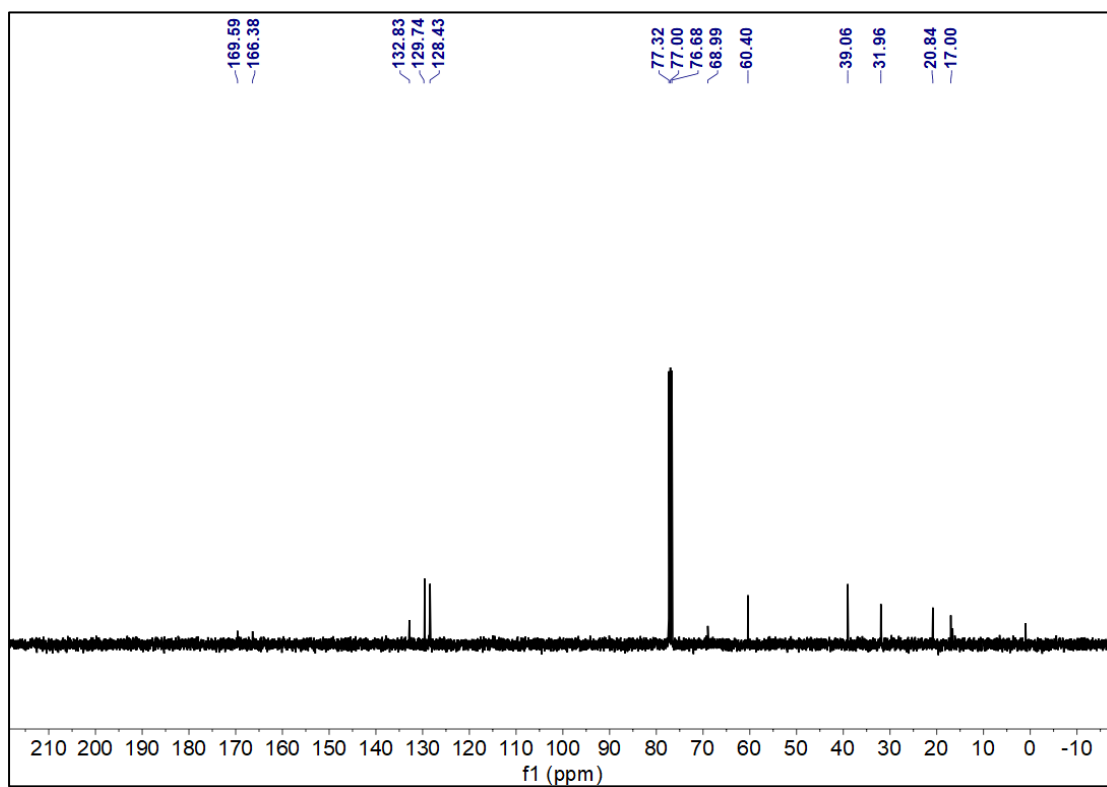

Supplement: d4cc01660b1.pdf [file d4cc01660b1.pdf]
